# Supplementary material for: A diet rich in high-glucoraphanin broccoli interacts with genotype to reduce discordance in plasma metabolite profiles by modulating mitochondrial function1
Source: PubMed Central journal article supplement (PMC3743733; doi:10.3945/ajcn.113.065235), 2013-08-14
Supplement: 98.3.712_ajcn065235SupplementaryData1.pdf [file 98.3.712_ajcn065235SupplementaryData1.pdf]

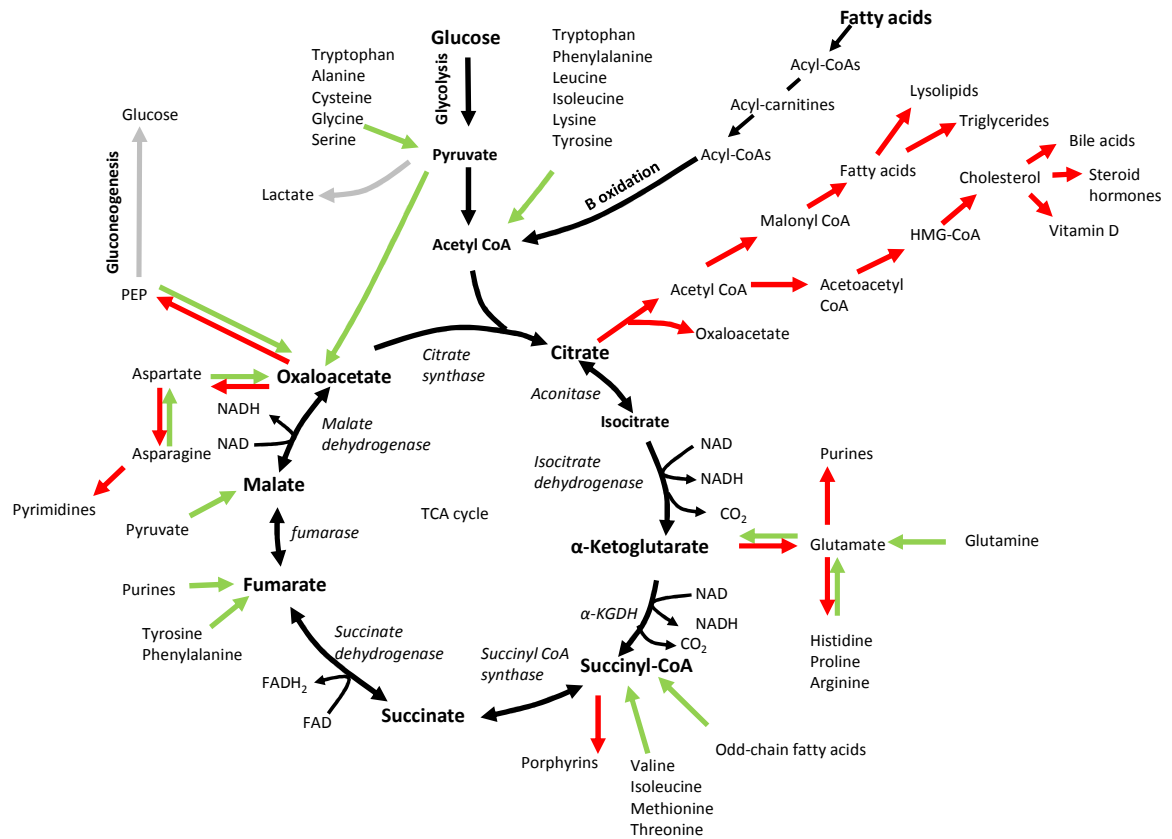

**SUPPLEMENTAL FIGURE S1.** Tricarboxylic acid cycle with anaplerotic reactions (green) and cataplerotic reactions (red)

**A** 10 year CVD risk

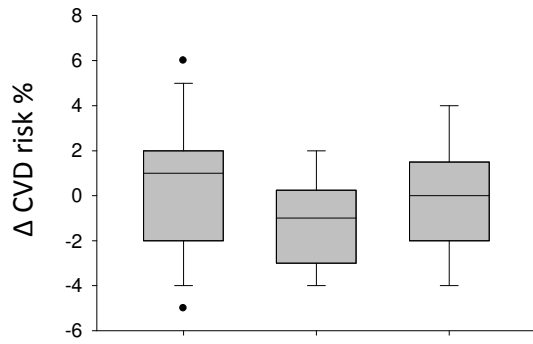

**B** LDL cholesterol

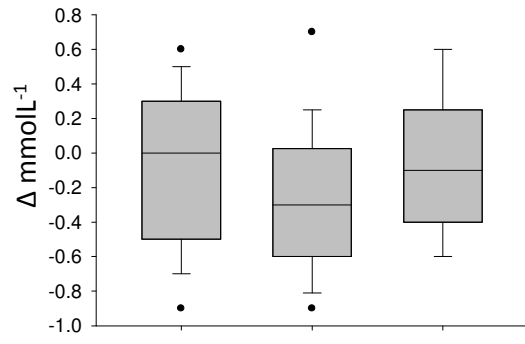

**C** Total cholesterol

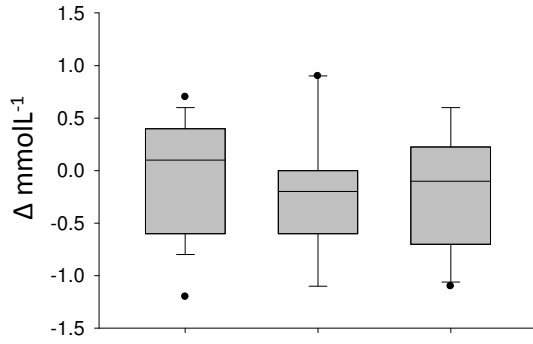

**D** HDL cholesterol

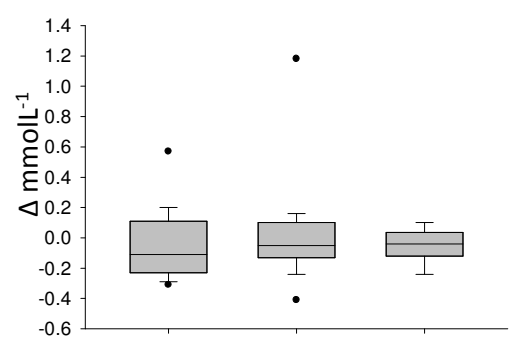

**E** Systolic BP

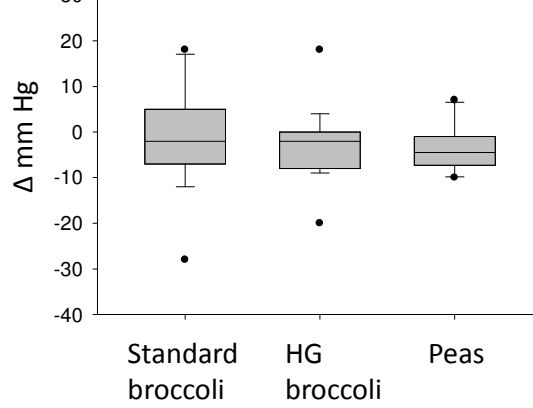

**F** Diastolic BP

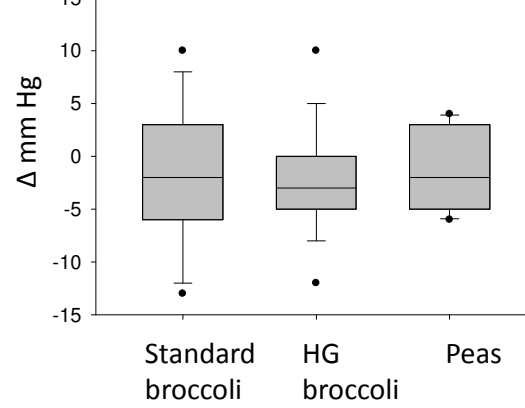

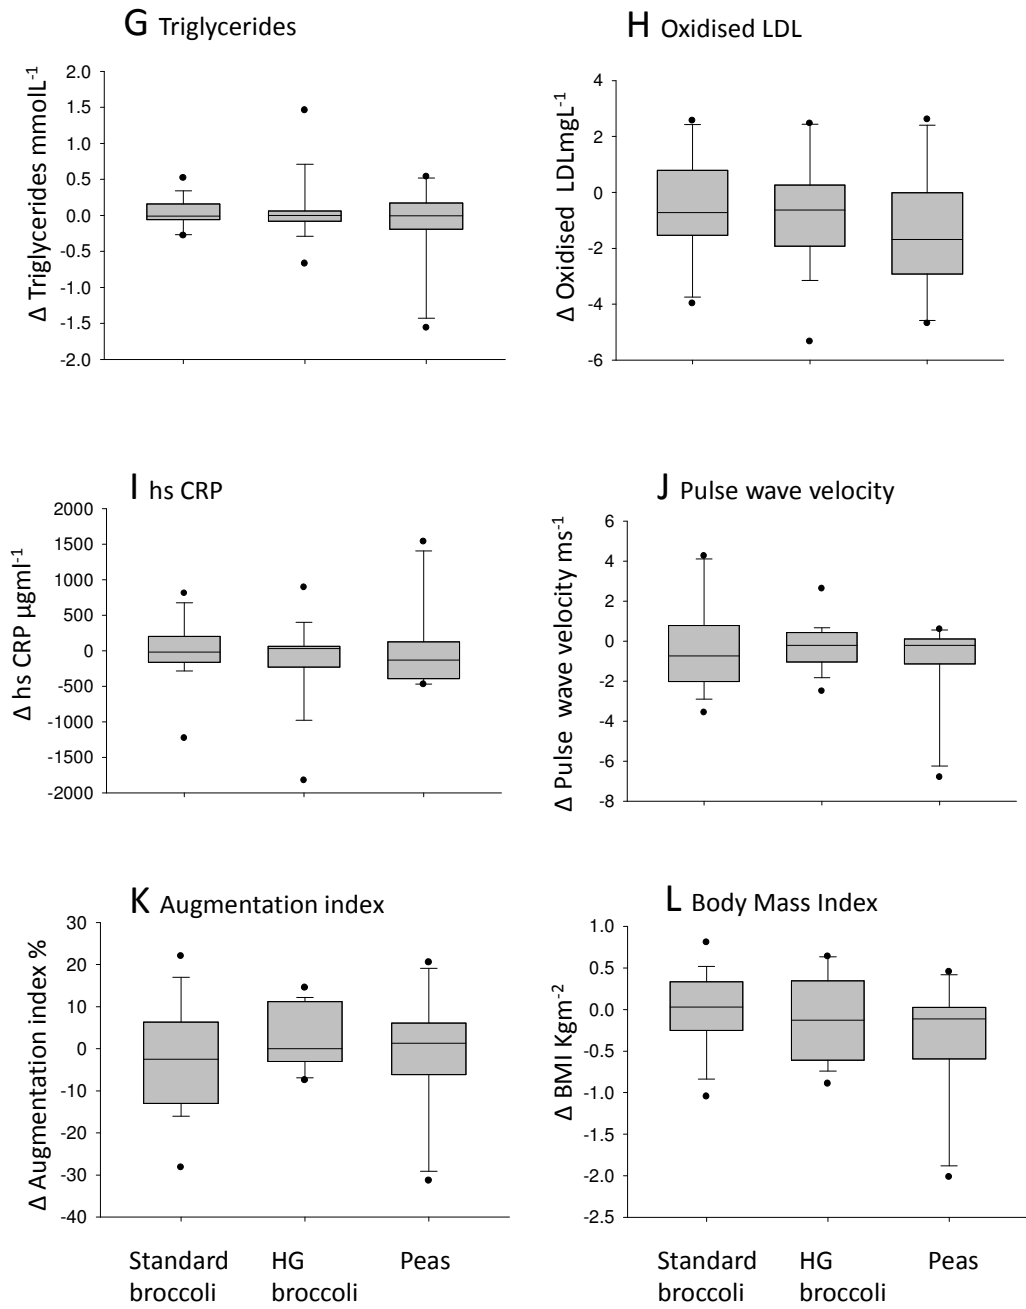

**SUPPLEMENTAL FIGURE S2** Box plots showing changes in biomarkers associated with CVD risk following the 12 week. There are no significant differences between the changes observed amongst the three dietary arms

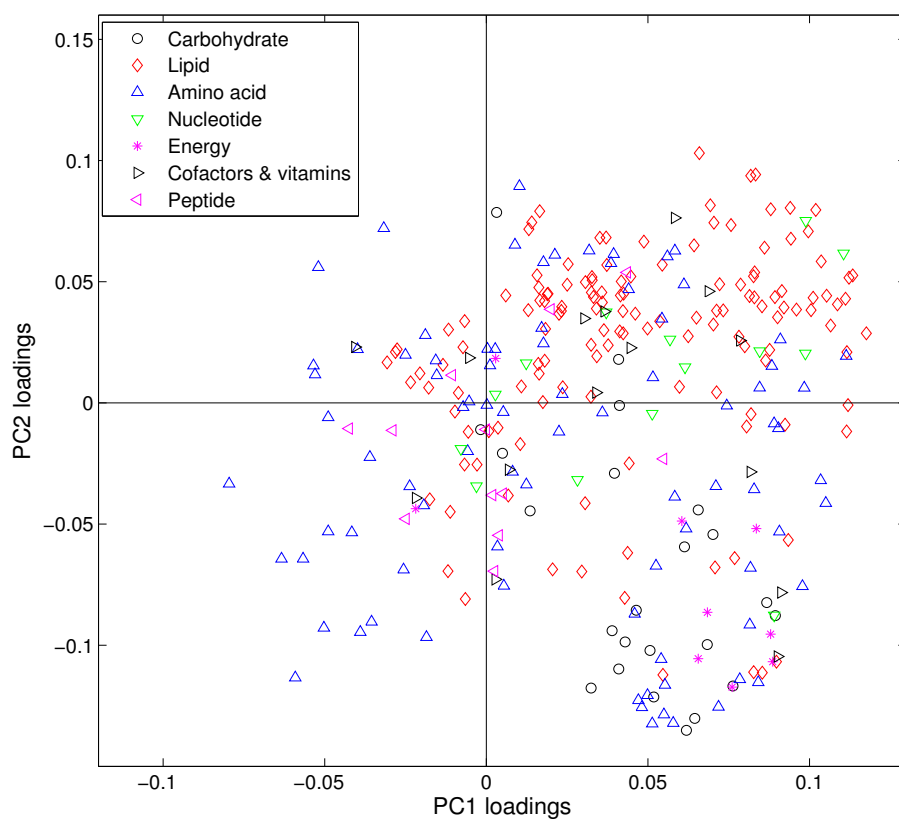

**SUPPLEMENTAL FIGURE S3.** PCA of metabolomics data, ratio post/pre-intervention. Loadings on 1st & 2nd axes showing the metabolites in terms of their super-pathways (N=48).

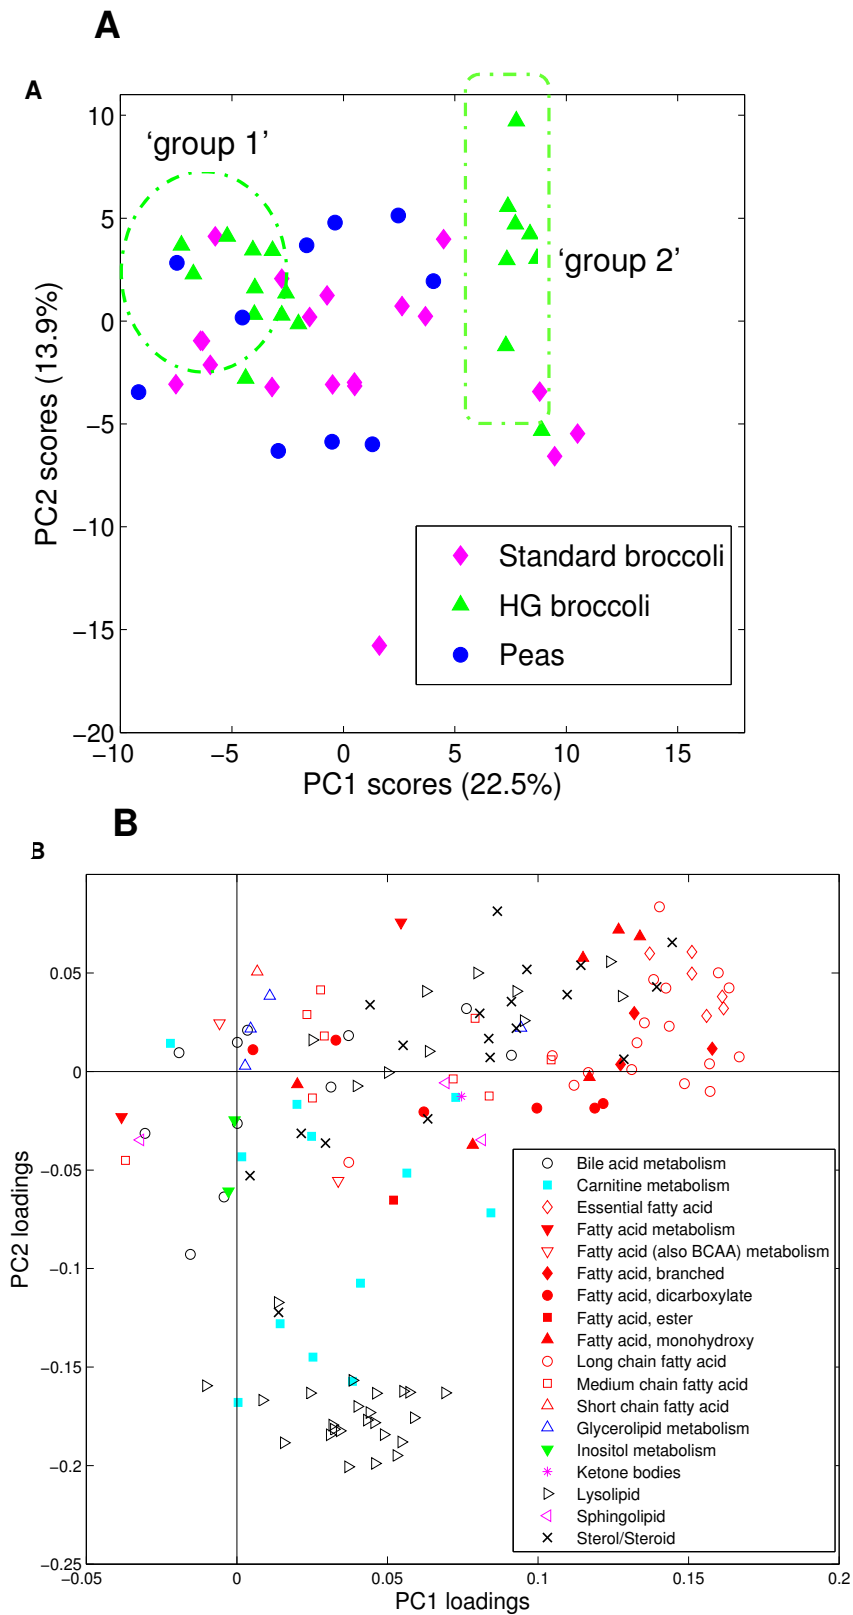

**SUPPLEMENTAL FIGURE S4.** PCA of lipid data, all volunteers, ratio post/pre-intervention. (A) Scores plot, and (B) loadings on 1st & 2nd axes showing the metabolites in terms of their sub-pathways (N=48).
