# Supplementary material for: A diet rich in high-glucoraphanin broccoli interacts with genotype to reduce discordance in plasma metabolite profiles by modulating mitochondrial function1
Source: PubMed Central journal article supplement (PMC3743733; doi:10.3945/ajcn.113.065235), 2013-08-14
Supplement: 98.3.712_ajcn065235SupplementaryData2.pdf [file 98.3.712_ajcn065235SupplementaryData2.pdf]

**SUPPLEMENTAL TABLE S1**

Dietary components significantly different between men and women. Results are of the mean values obtained from the two seven day diet dairies from 24 men and 24 women completed at baseline and after ten weeks.

|           | Male (n=24)  | Female (n=24) | P                  |
|-----------|--------------|---------------|--------------------|
| Energy kJ | 9616 ± 2428  | 7902 ± 1845   | 0.008 <sup>1</sup> |
| Fat g     | 93.4 ± 32.59 | 73.7 ± 19.83  | 0.014              |
| Protein g | 87.5 ± 17.75 | 77.9 ± 13.91  | 0.042              |
| Na g      | 3.2 ± 1.03   | 2.6 ± 0.74    | 0.024              |
| Cl g      | 4.8 ± 1.48   | 3.9 ± 1.17    | 0.025              |
| Alcohol g | 14.6 ± 10.99 | 7.7 ± 10.26   | 0.029              |

<sup>1</sup> P values from T-tests

## SUPPLEMENTAL TABLE S2

The p values that the differences between biomarkers of cardiovascular health occurred by chance

|                          | Diet              | Gender      | PAPOLG | GSTM1       | Diet x<br>gender | Diet x<br>PAPOLG | Diet X<br>GSTM1 | Gender X<br>PAPOLG | Gender X<br>GSTM1 |
|--------------------------|-------------------|-------------|--------|-------------|------------------|------------------|-----------------|--------------------|-------------------|
| Systolic blood pressure  | 0.72 <sup>1</sup> | 0.54        | 0.99   | 0.30        | 0.41             | 0.63             | 0.96            | 0.85               | 0.93              |
| Diastolic blood pressure | 0.92              | 0.72        | 0.89   | 0.63        | 0.49             | 0.98             | 0.68            | 0.96               | 0.77              |
| Pulse wave velocity      | 0.79              | <b>0.03</b> | 0.23   | <b>0.01</b> | 0.55             | <b>0.01</b>      | <b>0.05</b>     | 0.52               | 0.04              |
| Augmentation index       | 0.43              | 0.07        | 0.86   | 0.68        | 0.63             | 0.52             | 0.24            | 0.62               | 0.45              |
| Body mass index          | 0.29              | 0.79        | 0.63   | <b>0.05</b> | 0.33             | 0.15             | 0.07            | 0.46               | 0.21              |
| Weight                   | 0.36              | 0.89        | 0.61   | 0.07        | 0.35             | 0.15             | 0.05            | 0.46               | 0.26              |
| Total Cholesterol        | 0.38              | 0.53        | 0.29   | 0.86        | 0.27             | 0.41             | 0.57            | 0.22               | 0.64              |
| HDL cholesterol          | 0.91              | 0.60        | 0.09   | 0.87        | 0.29             | 0.24             | 0.99            | 0.29               | 0.47              |
| LDL cholesterol          | 0.29              | 0.39        | 0.29   | 0.79        | 0.21             | 0.71             | 0.63            | 0.51               | 0.95              |
| Triglycerides            | 0.72              | 0.14        | 0.36   | 0.79        | 0.70             | 0.98             | 0.32            | 0.90               | 0.91              |
| CRP                      | 0.38              | 0.68        | 0.16   | 0.37        | 0.21             | 0.91             | 0.92            | 0.61               | 0.43              |
| Oxidised LDL             | 0.60              | 0.72        | 0.91   | 0.83        | 0.34             | 0.95             | 0.75            | 0.21               | 0.68              |
| CVD 10 year risk         | 0.29              | 0.68        | 0.60   | 0.36        | 0.80             | 0.91             | 0.92            | 0.60               | 0.43              |

<sup>1</sup> P values derived from ANCOVA of the post intervention values with the pre-intervention values as co-variates in the model.

**SUPPLEMENTAL TABLE S3**

Details of the three SNPs that differentiate the two phenotype groups within the HG broccoli intervention arm

| SNP        | Position in DNA sequence and base change in PAPOLG |          | Frequency of major allele in study population % | Frequency of major allele previously reported % <sup>1</sup> |
|------------|----------------------------------------------------|----------|-------------------------------------------------|--------------------------------------------------------------|
| rs7579240  | -15544 G>T                                         | Upstream | 72.6                                            | 65.5                                                         |
| rs28459296 | 11074 A>G                                          | Intron 3 | 72.6                                            | 66.4                                                         |
| rs11687951 | 19963 G>C                                          | Intron 8 | 72.6                                            | 66.8                                                         |

<sup>1</sup> data summarised from <http://www.ncbi.nlm.nih.gov> for each individual SNP

**SUPPLEMENTAL TABLE S4**

P values of effect of Gender, Diet, Genotype, genotype x diet, gender x genotype and genotype x diet (n=48)

| Pathway                                    | Biochemical             | Gender             | Diet  | Gene  | Gender x diet | Gender x gene | Diet x gene |
|--------------------------------------------|-------------------------|--------------------|-------|-------|---------------|---------------|-------------|
| Alanine_aspartate_metabolism               | alanine                 | 0.281 <sup>1</sup> | 0.458 | 0.761 | 0.545         | 0.030         | 0.111       |
| Alanine_aspartate_metabolism               | asparagine              | 0.266              | 0.669 | 0.639 | 0.586         | 0.521         | 0.410       |
| Alanine_aspartate_metabolism               | aspartate               | 0.973              | 0.909 | 0.214 | 0.335         | 0.484         | 0.757       |
| Alanine_aspartate_metabolism               | N-acetylalanine         | 0.333              | 0.522 | 0.538 | 0.224         | 0.517         | 0.133       |
| Alanine_aspartate_metabolism               | N-acetyl-beta-alanine   | 0.142              | 0.339 | 0.472 | 0.066         | 0.875         | 0.043       |
| Butanoate_metabolism                       | 2-aminobutyrate         | 0.227              | 0.329 | 0.916 | 0.023         | 0.353         | 0.882       |
| Creatine_metabolism                        | creatine                | 0.049              | 0.291 | 0.224 | 0.670         | 0.399         | 0.746       |
| Creatine_metabolism                        | creatinine              | 0.025              | 0.659 | 0.477 | 0.328         | 0.189         | 0.819       |
| Cysteine_methionine_SAM_taurine_metabolism | 2-hydroxybutyrate (AHB) | 0.712              | 0.874 | 0.048 | 0.538         | 0.437         | 0.388       |
| Cysteine_methionine_SAM_taurine_metabolism | cysteine                | 0.689              | 0.727 | 0.088 | 0.509         | 0.965         | 0.395       |
| Cysteine_methionine_SAM_taurine_metabolism | cystine                 | 0.284              | 0.717 | 0.694 | 0.347         | 0.281         | 0.635       |
| Cysteine_methionine_SAM_taurine_metabolism | methionine              | 0.632              | 0.084 | 0.012 | 0.955         | 0.618         | 0.387       |
| Cysteine_methionine_SAM_taurine_metabolism | N-acetylmethionine      | 0.594              | 0.286 | 0.142 | 0.790         | 0.973         | 0.489       |
| Cysteine_methionine_SAM_taurine_metabolism | N-formylmethionine      | 0.302              | 0.913 | 0.660 | 0.889         | 0.370         | 0.353       |
| Cysteine_methionine_SAM_taurine_metabolism | S-methylcysteine        | 0.679              | 0.052 | 0.554 | 0.905         | 0.563         | 0.106       |
| Glutamate_metabolism                       | glutamate               | 0.352              | 0.451 | 0.257 | 0.373         | 0.646         | 0.392       |
| Glutamate_metabolism                       | glutamine               | 0.006              | 0.145 | 0.053 | 0.080         | 0.300         | 0.931       |
| Glutamate_metabolism                       | pyroglutamine           | 0.488              | 0.535 | 0.393 | 0.127         | 0.312         | 0.330       |
| Glutathione_metabolism                     | 5-oxoprolin             | 0.023              | 0.408 | 0.256 | 0.269         | 0.700         | 0.365       |

|                                     |                                     |       |       |       |       |       |       |
|-------------------------------------|-------------------------------------|-------|-------|-------|-------|-------|-------|
| Glutathione_metabolism              | glutathione, oxidized (GSSG)        | 0.460 | 0.881 | 0.917 | 0.969 | 0.353 | 0.939 |
| Glycine_serine_threonine_metabolism | beta-hydroxyypyruvate               | 0.961 | 0.735 | 0.243 | 0.515 | 0.330 | 0.781 |
| Glycine_serine_threonine_metabolism | betaine                             | 0.533 | 0.792 | 0.104 | 0.473 | 0.177 | 0.275 |
| Glycine_serine_threonine_metabolism | dimethylglycine                     | 0.648 | 0.223 | 0.807 | 0.829 | 0.647 | 0.885 |
| Glycine_serine_threonine_metabolism | glycine                             | 0.538 | 0.701 | 0.700 | 0.363 | 0.186 | 0.055 |
| Glycine_serine_threonine_metabolism | N-acetylglcine                      | 0.451 | 0.203 | 0.470 | 0.087 | 0.396 | 0.081 |
| Glycine_serine_threonine_metabolism | N-acetylthreonine                   | 0.043 | 0.774 | 0.829 | 0.285 | 0.212 | 0.670 |
| Glycine_serine_threonine_metabolism | sarcosine (N-Methylglycine)         | 0.356 | 0.362 | 0.950 | 0.833 | 0.343 | 0.272 |
| Glycine_serine_threonine_metabolism | serine                              | 0.136 | 0.663 | 0.963 | 0.283 | 0.694 | 0.611 |
| Glycine_serine_threonine_metabolism | threonine                           | 0.849 | 0.964 | 0.228 | 0.755 | 0.427 | 0.061 |
| Guanidino_acetamido_metabolism      | 4-acetamidobutanoate                | 0.508 | 0.309 | 0.144 | 0.597 | 0.906 | 0.273 |
| Histidine_metabolism                | 3-methylhistidine                   | 0.125 | 0.157 | 0.782 | 0.736 | 0.711 | 0.279 |
| Histidine_metabolism                | histidine                           | 0.161 | 0.625 | 0.060 | 0.775 | 0.764 | 0.222 |
| Lysine_metabolism                   | glutaroyl carnitine                 | 0.520 | 0.408 | 0.365 | 0.342 | 0.670 | 0.226 |
| Lysine_metabolism                   | lysine                              | 0.869 | 0.043 | 0.640 | 0.331 | 0.465 | 0.089 |
| Lysine_metabolism                   | N6-acetyllysine                     | 0.124 | 0.999 | 0.795 | 0.288 | 0.326 | 0.137 |
| Lysine_metabolism                   | pipecolate                          | 0.583 | 0.427 | 0.796 | 0.320 | 0.946 | 0.797 |
| Phenylalanine_tyrosine_metabolism   | 3-(4-hydroxyphenyl)lactate          | 0.168 | 0.375 | 0.065 | 0.171 | 0.691 | 0.080 |
| Phenylalanine_tyrosine_metabolism   | 3-hydroxyphenylacetate              | 0.342 | 0.526 | 0.631 | 0.428 | 0.054 | 0.135 |
| Phenylalanine_tyrosine_metabolism   | 3-methoxytyrosine                   | 0.980 | 0.147 | 0.254 | 0.194 | 0.291 | 0.369 |
| Phenylalanine_tyrosine_metabolism   | 3-phenylpropionate (hydrocinnamate) | 0.689 | 0.413 | 0.012 | 0.517 | 0.803 | 0.479 |
| Phenylalanine_tyrosine_metabolism   | 4-hydroxyphenylacetate              | 0.031 | 0.309 | 0.508 | 0.719 | 0.808 | 0.669 |
| Phenylalanine_tyrosine_metabolism   | 4-hydroxyphenylpyruvate             | 0.371 | 0.085 | 0.809 | 0.955 | 0.819 | 0.475 |
| Phenylalanine_tyrosine_metabolism   | o-cresol sulfate                    | 0.678 | 0.287 | 0.781 | 0.381 | 0.344 | 0.992 |
| Phenylalanine_tyrosine_metabolism   | p-cresol sulfate                    | 0.358 | 0.188 | 0.273 | 0.674 | 0.973 | 0.541 |
| Phenylalanine_tyrosine_metabolism   | phenol sulfate                      | 0.702 | 0.869 | 0.738 | 0.478 | 0.257 | 0.551 |
|                                     | phenylacetate                       | 0.817 | 0.599 | 0.290 | 0.307 | 0.975 | 0.624 |

|                                        |                                   |       |       |       |       |       |       |
|----------------------------------------|-----------------------------------|-------|-------|-------|-------|-------|-------|
| Phenylalanine_tyrosine_metabolism      |                                   |       |       |       |       |       |       |
| Phenylalanine_tyrosine_metabolism      | phenylacetylglutamine             | 0.977 | 0.391 | 0.578 | 0.758 | 0.926 | 0.730 |
| Phenylalanine_tyrosine_metabolism      | phenylalanine                     | 0.187 | 0.521 | 0.176 | 0.953 | 0.276 | 0.521 |
| Phenylalanine_tyrosine_metabolism      | phenyllactate (PLA)               | 0.003 | 0.942 | 0.144 | 0.391 | 0.310 | 0.296 |
| Phenylalanine_tyrosine_metabolism      | tyrosine                          | 0.316 | 0.993 | 0.005 | 0.646 | 0.937 | 0.467 |
| Tryptophan_metabolism                  | 3-indoxyl sulfate                 | 0.329 | 0.677 | 0.451 | 0.675 | 0.541 | 0.376 |
| Tryptophan_metabolism                  | C-glycosyltryptophan              | 0.449 | 0.037 | 0.898 | 0.630 | 0.402 | 0.945 |
| Tryptophan_metabolism                  | indoleacetate                     | 0.226 | 0.295 | 0.197 | 0.113 | 0.830 | 0.397 |
| Tryptophan_metabolism                  | indolelactate                     | 0.534 | 0.543 | 0.887 | 0.989 | 0.870 | 0.887 |
| Tryptophan_metabolism                  | indolepropionate                  | 0.571 | 0.416 | 0.467 | 0.301 | 0.173 | 0.620 |
| Tryptophan_metabolism                  | kynurenine                        | 0.957 | 0.725 | 0.525 | 0.878 | 0.684 | 0.658 |
| Tryptophan_metabolism                  | serotonin (5HT)                   | 0.851 | 0.945 | 0.119 | 0.080 | 0.477 | 0.907 |
| Tryptophan_metabolism                  | tryptophan                        | 0.695 | 0.515 | 0.273 | 0.981 | 0.638 | 0.863 |
| Tryptophan_metabolism                  | tryptophan betaine                | 0.305 | 0.642 | 0.743 | 0.131 | 0.649 | 0.591 |
| Urea_cycle_arginine_proline_metabolism | arginine                          | 0.556 | 0.089 | 0.077 | 0.078 | 0.328 | 0.158 |
| Urea_cycle_arginine_proline_metabolism | citrulline                        | 0.276 | 0.364 | 0.355 | 0.245 | 0.664 | 0.534 |
| Urea_cycle_arginine_proline_metabolism | N-acetylorithine                  | 0.754 | 0.572 | 0.708 | 0.891 | 0.930 | 0.677 |
| Urea_cycle_arginine_proline_metabolism | N-methyl proline                  | 0.850 | 0.664 | 0.912 | 0.139 | 0.368 | 0.918 |
| Urea_cycle_arginine_proline_metabolism | ornithine                         | 0.823 | 0.870 | 0.246 | 0.922 | 0.571 | 0.534 |
| Urea_cycle_arginine_proline_metabolism | proline                           | 0.821 | 0.936 | 0.103 | 0.889 | 0.295 | 0.622 |
| Urea_cycle_arginine_proline_metabolism | symmetric dimethylarginine (SDMA) | 0.148 | 0.943 | 0.218 | 0.676 | 0.927 | 0.140 |
| Urea_cycle_arginine_proline_metabolism | trans-4-hydroxyproline            | 0.448 | 0.989 | 0.107 | 0.464 | 0.373 | 0.892 |
| Urea_cycle_arginine_proline_metabolism | urea                              | 0.586 | 0.834 | 0.924 | 0.645 | 0.360 | 0.070 |
| Valine_leucine_isoleucine_metabolism   | 2-hydroxy-3-methylvalerate        | 0.144 | 0.499 | 0.142 | 0.843 | 0.273 | 0.071 |
| Valine_leucine_isoleucine_metabolism   | 2-hydroxyisobutyrate              | 0.724 | 0.045 | 0.494 | 0.995 | 0.682 | 0.694 |
| Valine_leucine_isoleucine_metabolism   | 2-methylbutyrylcarnitine          | 0.925 | 0.774 | 0.958 | 0.809 | 0.852 | 0.921 |
|                                        | 3-hydroxyisobutyrate              | 0.703 | 0.540 | 0.532 | 0.380 | 0.595 | 0.511 |

|                                                      |                              |       |       |       |       |       |       |
|------------------------------------------------------|------------------------------|-------|-------|-------|-------|-------|-------|
| Valine_leucine_isoleucine_metabolism                 |                              |       |       |       |       |       |       |
| Valine_leucine_isoleucine_metabolism                 | 3-methyl-2-oxobutyrate       | 0.063 | 0.111 | 0.005 | 0.720 | 0.640 | 0.048 |
| Valine_leucine_isoleucine_metabolism                 | 3-methyl-2-oxovalerate       | 0.025 | 0.306 | 0.014 | 0.844 | 0.152 | 0.042 |
| Valine_leucine_isoleucine_metabolism                 | 4-methyl-2-oxopentanoate     | 0.002 | 0.196 | 0.007 | 0.356 | 0.449 | 0.112 |
| Valine_leucine_isoleucine_metabolism                 | alpha-hydroxyisocaproate     | 0.012 | 0.639 | 0.013 | 0.437 | 0.712 | 0.007 |
| Valine_leucine_isoleucine_metabolism                 | alpha-hydroxyisovalerate     | 0.349 | 0.408 | 0.232 | 0.362 | 0.029 | 0.321 |
| Valine_leucine_isoleucine_metabolism                 | beta-hydroxyisovalerate      | 0.052 | 0.350 | 0.203 | 0.896 | 0.917 | 0.974 |
| Valine_leucine_isoleucine_metabolism                 | hydroxyisovaleroyl carnitine | 0.608 | 0.218 | 0.684 | 0.086 | 0.532 | 0.359 |
| Valine_leucine_isoleucine_metabolism                 | isobutyrylcarnitine          | 0.370 | 0.993 | 0.965 | 0.641 | 0.965 | 0.243 |
| Valine_leucine_isoleucine_metabolism                 | isoleucine                   | 0.781 | 0.434 | 0.280 | 0.331 | 0.181 | 0.762 |
| Valine_leucine_isoleucine_metabolism                 | isovalerylcarnitine          | 0.755 | 0.911 | 0.784 | 0.177 | 0.869 | 0.395 |
| Valine_leucine_isoleucine_metabolism                 | leucine                      | 0.121 | 0.999 | 0.470 | 0.941 | 0.868 | 0.829 |
| Valine_leucine_isoleucine_metabolism                 | tiglyl carnitine             | 0.269 | 0.401 | 0.996 | 0.063 | 0.585 | 0.947 |
| Valine_leucine_isoleucine_metabolism                 | valine                       | 0.045 | 0.838 | 0.792 | 0.484 | 0.216 | 0.852 |
| Advanced_glycation_endproduct                        | erythrose                    | 0.011 | 0.677 | 0.003 | 0.909 | 0.530 | 0.359 |
| Aminosugars_metabolism                               | erythronate                  | 0.092 | 0.870 | 0.325 | 0.755 | 0.444 | 0.779 |
| Aminosugars_metabolism                               | fucose                       | 0.281 | 0.182 | 0.921 | 0.244 | 0.755 | 0.768 |
| Fructose_mannose_galactose_starch_sucrose_metabolism | fructose                     | 0.039 | 0.967 | 0.389 | 0.046 | 0.919 | 0.769 |
| Fructose_mannose_galactose_starch_sucrose_metabolism | maltose                      | 0.005 | 0.660 | 0.049 | 0.231 | 0.166 | 0.535 |
| Fructose_mannose_galactose_starch_sucrose_metabolism | maltotetraose                | 0.022 | 0.362 | 0.463 | 0.127 | 0.360 | 0.713 |
| Fructose_mannose_galactose_starch_sucrose_metabolism | maltotriose                  | 0.008 | 0.858 | 0.090 | 0.262 | 0.344 | 0.755 |
| Fructose_mannose_galactose_starch_sucrose_metabolism | mannose                      | 0.038 | 0.475 | 0.270 | 0.589 | 0.778 | 0.781 |
| Fructose_mannose_galactose_starch_sucrose_metabolism | methyl-beta-glucopyranoside  | 0.213 | 0.438 | 0.732 | 0.002 | 0.594 | 0.106 |
| Glycolysis_gluconeogenesis_pyruvate_metabolism       | 1,5-anhydroglucitol (1,5-AG) | 0.889 | 0.904 | 0.206 | 0.920 | 0.991 | 0.765 |
| Glycolysis_gluconeogenesis_pyruvate_metabolism       | 1,6-anhydroglucose           | 0.044 | 0.724 | 0.674 | 0.313 | 0.177 | 0.648 |
| Glycolysis_gluconeogenesis_pyruvate_metabolism       | 3-phosphoglycerate           | 0.326 | 0.888 | 0.010 | 0.866 | 0.474 | 0.208 |
|                                                      | glucose                      | 0.030 | 0.371 | 0.270 | 0.130 | 0.719 | 0.331 |

|                                                |                                    |       |       |       |       |       |       |
|------------------------------------------------|------------------------------------|-------|-------|-------|-------|-------|-------|
| Glycolysis_gluconeogenesis_pyruvate_metabolism |                                    |       |       |       |       |       |       |
| Glycolysis_gluconeogenesis_pyruvate_metabolism | glucuronate                        | 0.110 | 0.471 | 0.169 | 0.322 | 0.397 | 0.607 |
| Glycolysis_gluconeogenesis_pyruvate_metabolism | glycerate                          | 0.329 | 0.653 | 0.049 | 0.295 | 0.918 | 0.955 |
| Glycolysis_gluconeogenesis_pyruvate_metabolism | lactate                            | 0.943 | 0.990 | 0.267 | 0.176 | 0.053 | 0.145 |
| Glycolysis_gluconeogenesis_pyruvate_metabolism | pyruvate                           | 0.371 | 0.769 | 0.523 | 0.440 | 0.547 | 0.346 |
| Glyoxylate_dicarboxylate_metabolism            | oxalate (ethanedioate)             | 0.879 | 0.251 | 0.065 | 0.576 | 0.204 | 0.348 |
| Nucleotide_sugars_pentose_metabolism           | arabinose                          | 0.295 | 0.055 | 0.571 | 0.457 | 0.892 | 0.975 |
| Nucleotide_sugars_pentose_metabolism           | arabitol                           | 0.031 | 0.580 | 0.988 | 0.327 | 0.078 | 0.087 |
| Nucleotide_sugars_pentose_metabolism           | ribitol                            | 0.295 | 0.587 | 0.265 | 0.335 | 0.652 | 0.411 |
| Nucleotide_sugars_pentose_metabolism           | threitol                           | 0.627 | 0.478 | 0.880 | 0.809 | 0.353 | 0.585 |
| Nucleotide_sugars_pentose_metabolism           | xylose                             | 0.490 | 0.410 | 0.950 | 0.723 | 0.745 | 0.409 |
| Ascorbate_aldarate_metabolism                  | threonate                          | 0.389 | 0.942 | 0.021 | 0.284 | 0.735 | 0.739 |
| Hemoglobin_porphyrin_metabolism                | bilirubin (E,E)                    | 0.058 | 0.828 | 0.105 | 0.609 | 0.135 | 0.845 |
| Hemoglobin_porphyrin_metabolism                | bilirubin (E,Z or Z,E)             | 0.329 | 0.888 | 0.674 | 0.407 | 0.244 | 0.086 |
| Hemoglobin_porphyrin_metabolism                | bilirubin (Z,Z)                    | 0.020 | 0.643 | 0.109 | 0.578 | 0.022 | 0.997 |
| Hemoglobin_porphyrin_metabolism                | biliverdin                         | 0.025 | 0.781 | 0.003 | 0.057 | 0.954 | 0.605 |
| Hemoglobin_porphyrin_metabolism                | heme                               | 0.007 | 0.277 | 0.294 | 0.556 | 0.873 | 0.474 |
| Hemoglobin_porphyrin_metabolism                | L-urobilin                         | 0.427 | 0.232 | 0.190 | 0.298 | 0.879 | 0.917 |
| Nicotinate_nicotinamide_metabolism             | adenosine 5'diphosphoribose        | 0.063 | 0.382 | 0.023 | 0.382 | 0.198 | 0.078 |
| Nicotinate_nicotinamide_metabolism             | nicotinamide                       | 0.715 | 0.972 | 0.074 | 0.389 | 0.191 | 0.656 |
| Nicotinate_nicotinamide_metabolism             | trigonelline (N'-methylnicotinate) | 0.683 | 0.574 | 0.338 | 0.819 | 0.826 | 0.549 |
| Pantothenate_CoA_metabolism                    | pantothenate                       | 0.887 | 0.691 | 0.832 | 0.907 | 0.586 | 0.304 |
| Riboflavin_metabolism                          | flavin adenine dinucleotide (FAD)  | 0.604 | 0.077 | 0.001 | 0.898 | 0.843 | 0.052 |
| Tocopherol_metabolism                          | alpha-tocopherol                   | 0.180 | 0.005 | 0.137 | 0.925 | 0.357 | 0.223 |
| Tocopherol_metabolism                          | gamma-CEHC                         | 0.427 | 0.656 | 0.545 | 0.987 | 0.803 | 0.553 |
| Vitamin_B6_metabolism                          | pyridoxate                         | 0.192 | 0.614 | 0.241 | 0.340 | 0.473 | 0.879 |
|                                                | alpha-ketoglutarate                | 0.121 | 0.084 | 0.237 | 0.271 | 0.081 | 0.242 |



|                           |                              |       |       |       |       |       |       |
|---------------------------|------------------------------|-------|-------|-------|-------|-------|-------|
| Krebs_cycle               |                              |       |       |       |       |       |       |
| Krebs_cycle               | citrate                      | 0.982 | 0.863 | 0.533 | 0.034 | 0.532 | 0.872 |
| Krebs_cycle               | fumarate                     | 0.946 | 0.939 | 0.798 | 0.930 | 0.418 | 0.880 |
| Krebs_cycle               | malate                       | 0.155 | 0.433 | 0.289 | 0.310 | 0.123 | 0.865 |
| Krebs_cycle               | succinate                    | 0.571 | 0.714 | 0.686 | 0.443 | 0.105 | 0.018 |
| Krebs_cycle               | succinylcarnitine            | 0.375 | 0.934 | 0.971 | 0.494 | 0.389 | 0.245 |
| Oxidative_phosphorylation | acetylphosphate              | 0.562 | 0.602 | 0.457 | 0.213 | 0.057 | 0.322 |
| Oxidative_phosphorylation | phosphate                    | 0.026 | 0.278 | 0.008 | 0.596 | 0.522 | 0.227 |
| Oxidative_phosphorylation | pyrophosphate (PPi)          | 0.718 | 0.950 | 0.481 | 0.955 | 0.274 | 0.486 |
| Bile_acid_metabolism      | chenodeoxycholate            | 0.078 | 0.810 | 0.368 | 0.206 | 0.714 | 0.658 |
| Bile_acid_metabolism      | cholate                      | 0.227 | 0.436 | 0.824 | 0.076 | 0.897 | 0.635 |
| Bile_acid_metabolism      | deoxycholate                 | 0.235 | 0.737 | 0.144 | 0.886 | 0.038 | 0.516 |
| Bile_acid_metabolism      | glycochenodeoxycholate       | 0.831 | 0.539 | 0.988 | 0.546 | 0.777 | 0.138 |
| Bile_acid_metabolism      | glycocholate                 | 0.619 | 0.174 | 0.429 | 0.373 | 0.329 | 0.605 |
| Bile_acid_metabolism      | glycochenate sulfate         | 0.449 | 0.076 | 0.031 | 0.915 | 0.272 | 0.140 |
| Bile_acid_metabolism      | glycodeoxycholate            | 0.669 | 0.844 | 0.644 | 0.700 | 0.986 | 0.498 |
| Bile_acid_metabolism      | glycolithocholate sulfate    | 0.134 | 0.029 | 0.975 | 0.054 | 0.740 | 0.957 |
| Bile_acid_metabolism      | glycoursodeoxycholate        | 0.995 | 0.495 | 0.729 | 0.327 | 0.741 | 0.704 |
| Bile_acid_metabolism      | taurochenate sulfate         | 0.208 | 0.390 | 0.301 | 0.048 | 0.528 | 0.174 |
| Bile_acid_metabolism      | tauroolithocholate 3-sulfate | 0.280 | 0.526 | 0.756 | 0.246 | 0.037 | 0.223 |
| Carnitine_metabolism      | 3-dehydrocarnitine           | 0.063 | 0.455 | 0.473 | 0.347 | 0.202 | 0.237 |
| Carnitine_metabolism      | acetylcarnitine              | 0.815 | 0.827 | 0.268 | 0.917 | 0.604 | 0.720 |
| Carnitine_metabolism      | carnitine                    | 0.579 | 0.309 | 0.514 | 0.361 | 0.787 | 0.537 |
| Carnitine_metabolism      | cis-4-decenoyl carnitine     | 0.615 | 0.343 | 0.230 | 0.800 | 0.179 | 0.814 |
| Carnitine_metabolism      | decanoylcarnitine            | 0.205 | 0.155 | 0.832 | 0.642 | 0.935 | 0.861 |
| Carnitine_metabolism      | deoxycarnitine               | 0.107 | 0.523 | 0.716 | 0.595 | 0.398 | 0.542 |
| Carnitine_metabolism      | hexanoylcarnitine            | 0.500 | 0.252 | 0.696 | 0.511 | 0.204 | 0.125 |

|                          |                                                      |       |       |       |       |       |       |
|--------------------------|------------------------------------------------------|-------|-------|-------|-------|-------|-------|
| Carnitine_metabolism     | laurylcarnitine                                      | 0.096 | 0.478 | 0.894 | 0.673 | 0.979 | 0.811 |
| Carnitine_metabolism     | octanoylcarnitine                                    | 0.247 | 0.393 | 0.865 | 0.583 | 0.496 | 0.506 |
| Carnitine_metabolism     | oleoylcarnitine                                      | 0.112 | 0.280 | 0.635 | 0.966 | 0.829 | 0.659 |
| Carnitine_metabolism     | palmitoylcarnitine                                   | 0.068 | 0.792 | 0.999 | 0.474 | 0.942 | 0.537 |
| Carnitine_metabolism     | stearoylcarnitine                                    | 0.015 | 0.854 | 0.783 | 0.276 | 0.791 | 0.748 |
| Essential_fatty_acid     | dihomo-linolenate (20:3n3 or n6)                     | 0.896 | 0.387 | 0.004 | 0.392 | 0.425 | 0.013 |
| Essential_fatty_acid     | docosahexaenoate (DHA; 22:6n3)                       | 0.842 | 0.240 | 0.005 | 0.228 | 0.760 | 0.003 |
| Essential_fatty_acid     | docosapentaenoate (n3 DPA; 22:5n3)                   | 0.563 | 0.126 | 0.016 | 0.193 | 0.667 | 0.003 |
| Essential_fatty_acid     | eicosapentaenoate (EPA; 20:5n3)                      | 0.603 | 0.116 | 0.051 | 0.232 | 0.969 | 0.003 |
| Essential_fatty_acid     | linoleate (18:2n6)                                   | 0.648 | 0.232 | 0.095 | 0.163 | 0.767 | 0.035 |
| Essential_fatty_acid     | linolenate [alpha or gamma; (18:3n3 or 6)]           | 0.894 | 0.230 | 0.143 | 0.385 | 0.892 | 0.010 |
| Fatty_acid_branched      | 13-methylmyristic acid                               | 0.382 | 0.030 | 0.187 | 0.550 | 0.285 | 0.072 |
| Fatty_acid_branched      | 15-methylpalmitate (isobar with 2-methylpalmitate)   | 0.472 | 0.051 | 0.007 | 0.225 | 0.312 | 0.053 |
| Fatty_acid_branched      | 17-methylstearate                                    | 0.923 | 0.071 | 0.026 | 0.428 | 0.149 | 0.348 |
| Fatty_acid_dicarboxylate | 3-carboxy-4-methyl-5-propyl-2-furanpropanoate (CMPF) | 0.456 | 0.852 | 0.891 | 0.593 | 0.674 | 0.646 |
| Fatty_acid_dicarboxylate | azelate (nonanedioate)                               | 0.231 | 0.064 | 0.325 | 0.296 | 0.007 | 0.675 |
| Fatty_acid_dicarboxylate | dodecanedioate                                       | 0.308 | 0.113 | 0.157 | 0.864 | 0.915 | 0.806 |
| Fatty_acid_dicarboxylate | hexadecanedioate                                     | 0.087 | 0.587 | 0.860 | 0.514 | 0.716 | 0.056 |
| Fatty_acid_dicarboxylate | octadecanedioate                                     | 0.206 | 0.963 | 0.359 | 0.979 | 0.476 | 0.346 |
| Fatty_acid_dicarboxylate | tetradecanedioate                                    | 0.176 | 0.479 | 0.321 | 0.708 | 0.909 | 0.055 |
| Fatty_acid_ester         | n-Butyl Oleate                                       | 0.691 | 0.409 | 0.062 | 0.298 | 0.071 | 0.342 |
| Fatty_acid_metabolism    | butyrylcarnitine                                     | 0.850 | 0.428 | 0.174 | 0.060 | 0.550 | 0.551 |
| Fatty_acid_metabolism    | isovalerate                                          | 0.106 | 0.265 | 0.006 | 0.011 | 0.113 | 0.175 |
| Fatty_acid_metabolism    | propionylcarnitine                                   | 0.421 | 0.527 | 0.127 | 0.729 | 0.677 | 0.472 |
| Fatty_acid_metabolism    | valerylcarnitine                                     | 0.731 | 0.221 | 0.018 | 0.142 | 0.081 | 0.439 |
| Fatty_acid_monohydroxy   | 13-HODE + 9-HODE                                     | 0.789 | 0.560 | 0.383 | 0.238 | 0.978 | 0.027 |
|                          | 2-hydroxyoctanoate                                   | 0.898 | 0.964 | 0.773 | 0.178 | 0.629 | 0.391 |

|                         |                                |       |       |       |       |       |       |
|-------------------------|--------------------------------|-------|-------|-------|-------|-------|-------|
| Fatty_acid_monohydroxy  |                                |       |       |       |       |       |       |
| Fatty_acid_monohydroxy  | 2-hydroxypalmitate             | 0.536 | 0.959 | 0.025 | 0.116 | 0.610 | 0.013 |
| Fatty_acid_monohydroxy  | 2-hydroxystearate              | 0.378 | 0.960 | 0.070 | 0.288 | 0.946 | 0.018 |
| Fatty_acid_monohydroxy  | 3-hydroxydecanoate             | 0.076 | 0.824 | 0.423 | 0.805 | 0.947 | 0.093 |
| Fatty_acid_monohydroxy  | 3-hydroxyoctanoate             | 0.103 | 0.335 | 0.896 | 0.945 | 0.488 | 0.858 |
| Glycerolipid_metabolism | choline                        | 0.885 | 0.906 | 0.189 | 0.283 | 0.721 | 0.806 |
| Glycerolipid_metabolism | glycerol 3-phosphate (G3P)     | 0.020 | 0.027 | 0.410 | 0.289 | 0.413 | 0.024 |
| Glycerolipid_metabolism | glycerophosphorylcholine (GPC) | 0.086 | 0.878 | 0.462 | 0.655 | 0.578 | 0.886 |
| Glycerolipid_metabolism | phosphoethanolamine            | 0.715 | 0.826 | 0.397 | 0.886 | 0.283 | 0.251 |
| Glycerolipid_metabolism | trimethylamine N-oxide         | 0.257 | 0.105 | 0.347 | 0.148 | 0.030 | 0.985 |
| Inositol_metabolism     | chiro-inositol                 | 0.552 | 0.404 | 0.394 | 0.151 | 0.421 | 0.414 |
| Inositol_metabolism     | myo-inositol                   | 0.381 | 0.632 | 0.338 | 0.695 | 0.641 | 0.479 |
| Ketone_bodies           | 3-hydroxybutyrate (BHBA)       | 0.542 | 0.302 | 0.631 | 0.404 | 0.482 | 0.888 |
| Long_chain_fatty_acid   | 10-heptadecenoate (17:1n7)     | 0.800 | 0.172 | 0.110 | 0.208 | 0.223 | 0.020 |
| Long_chain_fatty_acid   | 10-nonadecenoate (19:1n9)      | 0.304 | 0.170 | 0.010 | 0.408 | 0.138 | 0.017 |
| Long_chain_fatty_acid   | adrenate (22:4n6)              | 0.609 | 0.126 | 0.014 | 0.472 | 0.545 | 0.117 |
| Long_chain_fatty_acid   | arachidonate (20:4n6)          | 0.245 | 0.442 | 0.029 | 0.323 | 0.731 | 0.011 |
| Long_chain_fatty_acid   | cis-vaccenate (18:1n7)         | 0.572 | 0.466 | 0.700 | 0.691 | 0.750 | 0.029 |
| Long_chain_fatty_acid   | dihomo-linoleate (20:2n6)      | 0.491 | 0.057 | 0.005 | 0.294 | 0.830 | 0.021 |
| Long_chain_fatty_acid   | eicosenoate (20:1n9 or 11)     | 0.411 | 0.244 | 0.077 | 0.275 | 0.756 | 0.030 |
| Long_chain_fatty_acid   | margarate (17:0)               | 0.457 | 0.030 | 0.064 | 0.186 | 0.144 | 0.009 |
| Long_chain_fatty_acid   | myristate (14:0)               | 0.820 | 0.277 | 0.084 | 0.265 | 0.491 | 0.013 |
| Long_chain_fatty_acid   | myristoleate (14:1n5)          | 0.112 | 0.908 | 0.194 | 0.591 | 0.138 | 0.070 |
| Long_chain_fatty_acid   | nonadecanoate (19:0)           | 0.656 | 0.077 | 0.016 | 0.514 | 0.170 | 0.088 |
| Long_chain_fatty_acid   | oleate (18:1n9)                | 0.548 | 0.408 | 0.644 | 0.361 | 0.392 | 0.184 |
| Long_chain_fatty_acid   | palmitate (16:0)               | 0.551 | 0.183 | 0.044 | 0.188 | 0.726 | 0.018 |
|                         | palmitoleate (16:1n7)          | 0.246 | 0.463 | 0.127 | 0.143 | 0.549 | 0.045 |

|                       |                                          |       |       |       |       |       |       |
|-----------------------|------------------------------------------|-------|-------|-------|-------|-------|-------|
| Long_chain_fatty_acid |                                          |       |       |       |       |       |       |
| Long_chain_fatty_acid | pentadecanoate (15:0)                    | 0.518 | 0.266 | 0.050 | 0.126 | 0.506 | 0.005 |
| Long_chain_fatty_acid | stearate (18:0)                          | 0.623 | 0.187 | 0.062 | 0.231 | 0.757 | 0.054 |
| Long_chain_fatty_acid | stearidonate (18:4n3)                    | 0.017 | 0.625 | 0.676 | 0.070 | 0.008 | 0.285 |
| Lysolipid             | 1-arachidonoylglycerophosphocholine      | 0.036 | 0.433 | 0.096 | 0.161 | 0.799 | 0.687 |
| Lysolipid             | 1-arachidonoylglycerophosphoethanolamine | 0.330 | 0.648 | 0.001 | 0.084 | 0.286 | 0.038 |
| Lysolipid             | 1-arachidonoylglycerophosphoinositol     | 0.650 | 0.429 | 0.037 | 0.397 | 0.092 | 0.006 |
| Lysolipid             | 1-docosahexaenoylglycerophosphocholine   | 0.435 | 0.805 | 0.251 | 0.167 | 0.316 | 0.648 |
| Lysolipid             | 1-docosapentaenoylglycerophosphocholine  | 0.035 | 0.488 | 0.384 | 0.052 | 0.501 | 0.846 |
| Lysolipid             | 1-eicosadienoylglycerophosphocholine     | 0.220 | 0.304 | 0.037 | 0.250 | 0.075 | 0.601 |
| Lysolipid             | 1-eicosatrienoylglycerophosphocholine    | 0.033 | 0.130 | 0.405 | 0.255 | 0.914 | 0.361 |
| Lysolipid             | 1-heptadecanoylglycerophosphocholine     | 0.426 | 0.939 | 0.035 | 0.086 | 0.357 | 0.629 |
| Lysolipid             | 1-linoleoylglycerophosphocholine         | 0.045 | 0.723 | 0.212 | 0.564 | 0.641 | 0.670 |
| Lysolipid             | 1-linoleoylglycerophosphoethanolamine    | 0.184 | 0.859 | 0.282 | 0.848 | 0.789 | 0.661 |
| Lysolipid             | 1-myristoylglycerophosphocholine         | 0.956 | 0.325 | 0.091 | 0.427 | 0.258 | 0.308 |
| Lysolipid             | 1-oleoylglycerophosphocholine            | 0.075 | 0.326 | 0.120 | 0.330 | 0.143 | 0.441 |
| Lysolipid             | 1-oleoylglycerophosphoethanolamine       | 0.775 | 0.226 | 0.125 | 0.771 | 0.235 | 0.007 |
| Lysolipid             | 1-palmitoleoylglycerophosphocholine      | 0.340 | 0.381 | 0.111 | 0.528 | 0.392 | 0.586 |
| Lysolipid             | 1-palmitoylglycerophosphocholine         | 0.078 | 0.708 | 0.078 | 0.179 | 0.193 | 0.447 |
| Lysolipid             | 1-palmitoylglycerophosphoethanolamine    | 0.185 | 0.252 | 0.025 | 0.731 | 0.831 | 0.208 |
| Lysolipid             | 1-palmitoylplasménylethanolamine         | 0.861 | 0.778 | 0.005 | 0.366 | 0.588 | 0.133 |
| Lysolipid             | 1-pentadecanoylglycerophosphocholine     | 0.197 | 0.511 | 0.146 | 0.377 | 0.225 | 0.684 |
| Lysolipid             | 1-stearoylglycerophosphocholine          | 0.212 | 0.733 | 0.074 | 0.267 | 0.268 | 0.236 |
| Lysolipid             | 1-stearoylglycerophosphoethanolamine     | 0.525 | 0.852 | 0.590 | 0.352 | 0.164 | 0.565 |
| Lysolipid             | 1-stearoylglycerophosphoinositol         | 0.702 | 0.576 | 0.026 | 0.500 | 0.829 | 0.027 |
| Lysolipid             | 2-arachidonoylglycerophosphocholine      | 0.030 | 0.074 | 0.051 | 0.137 | 0.139 | 0.459 |
| Lysolipid             | 2-arachidonoylglycerophosphoethanolamine | 0.084 | 0.651 | 0.087 | 0.092 | 0.371 | 0.408 |

|                         |                                           |       |       |       |       |       |       |
|-------------------------|-------------------------------------------|-------|-------|-------|-------|-------|-------|
| Lysolipid               |                                           |       |       |       |       |       |       |
| Lysolipid               | 2-docosaenoylglycerophosphocholine        | 0.887 | 0.286 | 0.528 | 0.212 | 0.081 | 0.263 |
| Lysolipid               | 2-docosaenoylglycerophosphoethanolamine   | 0.794 | 0.612 | 0.358 | 0.354 | 0.242 | 0.110 |
| Lysolipid               | 2-linoleoylglycerophosphocholine          | 0.085 | 0.496 | 0.337 | 0.519 | 0.371 | 0.322 |
| Lysolipid               | 2-linoleoylglycerophosphoethanolamine     | 0.635 | 0.560 | 0.014 | 0.144 | 0.371 | 0.252 |
| Lysolipid               | 2-myristoylglycerophosphocholine          | 0.730 | 0.419 | 0.295 | 0.239 | 0.705 | 0.471 |
| Lysolipid               | 2-oleoylglycerophosphocholine             | 0.030 | 0.139 | 0.395 | 0.110 | 0.171 | 0.228 |
| Lysolipid               | 2-oleoylglycerophosphoethanolamine        | 0.261 | 0.269 | 0.407 | 0.948 | 0.298 | 0.334 |
| Lysolipid               | 2-palmitoleoylglycerophosphocholine       | 0.529 | 0.415 | 0.069 | 0.593 | 0.243 | 0.649 |
| Lysolipid               | 2-palmitoylglycerophosphocholine          | 0.066 | 0.981 | 0.075 | 0.145 | 0.798 | 0.330 |
| Lysolipid               | 2-palmitoylglycerophosphoethanolamine     | 0.020 | 0.691 | 0.008 | 0.918 | 0.432 | 0.284 |
| Lysolipid               | 2-stearoylglycerophosphocholine           | 0.385 | 0.915 | 0.066 | 0.174 | 0.165 | 0.430 |
| Medium_chain_fatty_acid | 10-undecenoate (11:1n1)                   | 0.148 | 0.690 | 0.781 | 0.769 | 0.984 | 0.080 |
| Medium_chain_fatty_acid | 5-dodecenoate (12:1n7)                    | 0.231 | 0.223 | 0.855 | 0.874 | 0.617 | 0.009 |
| Medium_chain_fatty_acid | caprate (10:0)                            | 0.532 | 0.076 | 0.215 | 0.732 | 0.890 | 0.308 |
| Medium_chain_fatty_acid | caproate (6:0)                            | 0.214 | 0.987 | 0.047 | 0.656 | 0.759 | 0.641 |
| Medium_chain_fatty_acid | caprylate (8:0)                           | 0.628 | 0.519 | 0.441 | 0.584 | 0.630 | 0.799 |
| Medium_chain_fatty_acid | heptanoate (7:0)                          | 0.237 | 0.998 | 0.493 | 0.666 | 0.177 | 0.216 |
| Medium_chain_fatty_acid | laurate (12:0)                            | 0.533 | 0.775 | 0.353 | 0.887 | 0.733 | 0.231 |
| Medium_chain_fatty_acid | pelargonate (9:0)                         | 0.120 | 0.362 | 0.106 | 0.886 | 0.989 | 0.286 |
| Medium_chain_fatty_acid | undecanoate (11:0)                        | 0.262 | 0.940 | 0.435 | 0.421 | 0.207 | 0.507 |
| Short_chain_fatty_acid  | valerate                                  | 0.680 | 0.588 | 0.463 | 0.513 | 0.678 | 0.789 |
| Sphingolipid            | palmitoyl sphingomyelin                   | 0.408 | 0.020 | 0.679 | 0.914 | 0.463 | 0.129 |
| Sphingolipid            | sphingosine                               | 0.742 | 0.808 | 0.302 | 0.054 | 0.250 | 0.677 |
| Sphingolipid            | stearoyl sphingomyelin                    | 0.299 | 0.216 | 0.709 | 0.565 | 0.836 | 0.383 |
| Sterol_Steroid          | 21-hydroxypregnenolone disulfate          | 0.068 | 0.250 | 0.027 | 0.073 | 0.878 | 0.518 |
|                         | 4-androsten-3beta,17beta-diol disulfate 1 | 0.300 | 0.042 | 0.938 | 0.026 | 0.629 | 0.555 |

|                                                   |                                                |       |       |       |       |             |
|---------------------------------------------------|------------------------------------------------|-------|-------|-------|-------|-------------|
| Sterol_Steroid                                    |                                                |       |       |       |       |             |
| Sterol_Steroid                                    | 4-androsten-3beta,17beta-diol disulfate 2      | 0.030 | 0.175 | 0.034 | 0.016 | 0.786 0.252 |
| Sterol_Steroid                                    | 5alpha-androstan-3beta,17beta-diol disulfate   | 0.531 | 0.097 | 0.860 | 0.296 | 0.505 0.990 |
| Sterol_Steroid                                    | 5alpha-pregnan-3beta,20alpha-diol disulfate    | 0.021 | 0.973 | 0.503 | 0.088 | 0.547 0.556 |
| Sterol_Steroid                                    | 7-alpha-hydroxy-3-oxo-4-cholestenoate (7-Hoca) | 0.171 | 0.091 | 0.719 | 0.180 | 0.919 0.002 |
| Sterol_Steroid                                    | andro steroid monosulfate 1                    | 0.488 | 0.062 | 0.190 | 0.778 | 0.264 0.871 |
| Sterol_Steroid                                    | andro steroid monosulfate 2                    | 0.001 | 0.359 | 0.062 | 0.054 | 0.519 0.433 |
| Sterol_Steroid                                    | androsterone sulfate                           | 0.205 | 0.121 | 0.930 | 0.743 | 0.874 0.043 |
| Sterol_Steroid                                    | beta-sitosterol                                | 0.757 | 0.215 | 0.157 | 0.251 | 0.451 0.315 |
| Sterol_Steroid                                    | cholesterol                                    | 0.098 | 0.248 | 0.305 | 0.666 | 0.523 0.262 |
| Sterol_Steroid                                    | cortisol                                       | 0.243 | 0.391 | 0.875 | 0.696 | 0.443 0.403 |
| Sterol_Steroid                                    | cortisone                                      | 0.822 | 0.942 | 0.276 | 0.508 | 0.196 0.312 |
| Sterol_Steroid                                    | dehydroisoandrosterone sulfate (DHEA-S)        | 0.005 | 0.042 | 0.012 | 0.003 | 0.819 0.001 |
| Sterol_Steroid                                    | epiandrosterone sulfate                        | 0.340 | 0.092 | 0.420 | 0.432 | 0.764 0.008 |
| Sterol_Steroid                                    | lathosterol                                    | 0.135 | 0.668 | 0.597 | 0.085 | 0.032 0.842 |
| Sterol_Steroid                                    | pregn steroid monosulfate                      | 0.039 | 0.249 | 0.278 | 0.044 | 0.773 0.010 |
| Sterol_Steroid                                    | pregnen-diol disulfate                         | 0.217 | 0.352 | 0.433 | 0.063 | 0.675 0.829 |
| Sterol_Steroid                                    | pregnenolone sulfate                           | 0.294 | 0.156 | 0.002 | 0.158 | 0.485 0.198 |
| Sterol_Steroid                                    | squalene                                       | 0.294 | 0.194 | 0.657 | 0.391 | 0.091 0.089 |
| Purine_metabolism_adenine_containing              | adenosine 5'-diphosphate (ADP)                 | 0.371 | 0.450 | 0.218 | 0.905 | 0.523 0.074 |
| Purine_metabolism_adenine_containing              | adenosine 5'-monophosphate (AMP)               | 0.431 | 0.654 | 0.220 | 0.518 | 0.152 0.954 |
| Purine_metabolism_adenine_containing              | N1-methyladenosine                             | 0.897 | 0.198 | 0.036 | 0.221 | 0.586 0.896 |
| Purine_metabolism_guanine_containing              | N1-methylguanosine                             | 0.266 | 0.877 | 0.452 | 0.113 | 0.102 0.332 |
| Purine_metabolism_guanine_containing              | N2,N2-dimethylguanosine                        | 0.474 | 0.162 | 0.326 | 0.810 | 0.231 0.147 |
| Purine_metabolism_guanine_containing              | N6-carbamoylthreonyladenosine                  | 0.214 | 0.569 | 0.248 | 0.191 | 0.169 0.491 |
| Purine_metabolism_hypoxanthine_inosine_containing | hypoxanthine                                   | 0.701 | 0.609 | 0.478 | 0.331 | 0.725 0.099 |
|                                                   | xanthine                                       | 0.521 | 0.032 | 0.497 | 0.088 | 0.191 0.998 |

|                                                   |                                   |       |       |       |       |       |       |
|---------------------------------------------------|-----------------------------------|-------|-------|-------|-------|-------|-------|
| Purine_metabolism_hypoxanthine_inosine_containing |                                   |       |       |       |       |       |       |
| Purine_metabolism_urate_metabolism                | urate                             | 0.006 | 0.387 | 0.040 | 0.270 | 0.528 | 0.119 |
| Purine_pyrimidine_metabolism                      | methylphosphate                   | 0.211 | 0.641 | 0.379 | 0.551 | 0.864 | 0.623 |
| Pyrimidine_metabolism_cytidine_containing         | N4-acetylcytidine                 | 0.407 | 0.002 | 0.343 | 0.981 | 0.313 | 0.470 |
| Pyrimidine_metabolism_uracil_containing           | 5-methyluridine (ribothymidine)   | 0.470 | 0.310 | 0.008 | 0.897 | 0.692 | 0.277 |
| Pyrimidine_metabolism_uracil_containing           | pseudouridine                     | 0.072 | 0.812 | 0.057 | 0.064 | 0.708 | 0.018 |
| Pyrimidine_metabolism_uracil_containing           | uridine                           | 0.858 | 0.987 | 0.071 | 0.901 | 0.932 | 0.023 |
| Dipeptide                                         | aspartylphenylalanine             | 0.731 | 0.791 | 0.325 | 0.730 | 0.862 | 0.112 |
| Dipeptide                                         | cyclo(leu-pro)                    | 0.700 | 0.254 | 0.159 | 0.595 | 0.127 | 0.768 |
| Dipeptide                                         | phenylalanylphenylalanine         | 0.552 | 0.905 | 0.833 | 0.950 | 0.927 | 0.334 |
| Dipeptide                                         | pro-hydroxy-pro                   | 0.667 | 0.534 | 0.104 | 0.333 | 0.863 | 0.663 |
| gammaglutamyl                                     | gamma-glutamylalanine             | 0.250 | 0.727 | 0.171 | 0.670 | 0.643 | 0.107 |
| gammaglutamyl                                     | gamma-glutamylglutamine           | 0.169 | 0.653 | 0.522 | 0.253 | 0.881 | 0.100 |
| gammaglutamyl                                     | gamma-glutamylisoleucine          | 0.419 | 0.496 | 0.602 | 0.347 | 0.519 | 0.576 |
| gammaglutamyl                                     | gamma-glutamylleucine             | 0.342 | 0.471 | 0.878 | 0.363 | 0.783 | 0.068 |
| gammaglutamyl                                     | gamma-glutamylmethionine          | 0.298 | 0.008 | 0.937 | 0.668 | 0.741 | 0.607 |
| gammaglutamyl                                     | gamma-glutamylphenylalanine       | 0.091 | 0.267 | 0.195 | 0.808 | 0.432 | 0.473 |
| gammaglutamyl                                     | gamma-glutamyltyrosine            | 0.543 | 0.392 | 0.084 | 0.443 | 0.886 | 0.207 |
| gammaglutamyl                                     | gamma-glutamylvaline              | 0.942 | 0.551 | 0.503 | 0.875 | 0.980 | 0.973 |
| Polypeptide                                       | bradykinin                        | 0.323 | 0.459 | 0.226 | 0.452 | 0.242 | 0.387 |
| Polypeptide                                       | bradykinin, hydroxy-pro(3)        | 0.962 | 0.140 | 0.060 | 0.234 | 0.805 | 0.080 |
| Benzoate_metabolism                               | 2-hydroxyhippurate (salicylurate) | 0.648 | 0.883 | 0.922 | 0.753 | 0.288 | 0.513 |
| Benzoate_metabolism                               | 3-hydroxyhippurate                | 0.796 | 0.904 | 0.567 | 0.332 | 0.186 | 0.505 |
| Benzoate_metabolism                               | 4-ethylphenylsulfate              | 0.603 | 0.113 | 0.237 | 0.922 | 0.726 | 0.382 |
| Benzoate_metabolism                               | 4-vinylphenol sulfate             | 0.835 | 0.771 | 0.581 | 0.952 | 0.174 | 0.287 |
| Benzoate_metabolism                               | benzoate                          | 0.000 | 0.836 | 0.430 | 0.311 | 0.058 | 0.239 |
|                                                   | catechol sulfate                  | 0.333 | 0.165 | 0.697 | 0.014 | 0.937 | 0.502 |

|                      |                                    |       |       |       |       |       |       |
|----------------------|------------------------------------|-------|-------|-------|-------|-------|-------|
| Benzoate_metabolism  |                                    |       |       |       |       |       |       |
| Benzoate_metabolism  | hippurate                          | 0.926 | 0.350 | 0.035 | 0.032 | 0.601 | 0.719 |
| Benzoate_metabolism  | methyl-4-hydroxybenzoate           | 0.044 | 0.789 | 0.588 | 0.949 | 0.610 | 0.565 |
| Chemical             | 2-ethylhexanoate                   | 0.097 | 0.545 | 0.569 | 0.966 | 0.086 | 0.805 |
| Chemical             | diisopropanolamine                 | 0.933 | 0.865 | 0.933 | 0.601 | 0.081 | 0.158 |
| Chemical             | glycerol 2-phosphate               | 0.983 | 0.234 | 0.685 | 0.744 | 0.094 | 0.184 |
| Chemical             | glycolate (hydroxyacetate)         | 0.739 | 0.151 | 0.611 | 0.864 | 0.694 | 0.766 |
| Chemical             | iminodiacetate (IDA)               | 0.689 | 0.025 | 0.796 | 0.438 | 0.267 | 0.600 |
| Drug                 | 2-hydroxyacetaminophen sulfate     | 0.787 | 0.758 | 0.256 | 0.638 | 0.429 | 0.364 |
| Drug                 | 2-methoxyacetaminophen glucuronide | 0.730 | 0.929 | 0.228 | 0.323 | 0.995 | 0.069 |
| Drug                 | 2-methoxyacetaminophen sulfate     | 0.602 | 0.642 | 0.198 | 0.347 | 0.915 | 0.098 |
| Drug                 | 3-(cystein-S-yl)acetaminophen      | 0.873 | 0.531 | 0.188 | 0.102 | 0.873 | 0.248 |
| Drug                 | 4-acetamidophenol                  | 0.937 | 0.275 | 0.219 | 0.133 | 0.750 | 0.119 |
| Drug                 | 4-acetaminophen sulfate            | 0.821 | 0.730 | 0.218 | 0.668 | 0.406 | 0.358 |
| Drug                 | codeine                            | 0.616 | 0.714 | 0.152 | 0.038 | 0.222 | 0.332 |
| Drug                 | desmethylnaproxen sulfate          | 0.614 | 0.311 | 0.483 | 0.030 | 0.458 | 0.091 |
| Drug                 | ibuprofen                          | 0.529 | 0.197 | 0.205 | 0.522 | 0.241 | 0.359 |
| Drug                 | naproxen                           | 0.966 | 0.251 | 0.751 | 0.515 | 0.915 | 0.387 |
| Drug                 | p-acetamidophenylglucuronide       | 0.498 | 0.521 | 0.259 | 0.639 | 0.679 | 0.173 |
| Drug                 | pivaloylcarnitine                  | 0.457 | 0.777 | 0.359 | 0.332 | 0.743 | 0.260 |
| Drug                 | pseudoephedrine                    | 0.053 | 0.462 | 0.572 | 0.628 | 0.469 | 0.240 |
| Drug                 | quinine                            | 0.816 | 0.567 | 0.570 | 0.589 | 0.472 | 0.422 |
| EDTA                 | EDTA                               | 0.154 | 0.898 | 0.269 | 0.616 | 0.325 | 0.170 |
| Food_component_Plant | cinnamoylglycine                   | 0.271 | 0.871 | 0.070 | 0.419 | 0.969 | 0.149 |
| Food_component_Plant | homostachydrine                    | 0.732 | 0.046 | 0.975 | 0.463 | 0.436 | 0.078 |
| Food_component_Plant | piperine                           | 0.224 | 0.293 | 0.457 | 0.086 | 0.894 | 0.169 |
|                      | quininate                          | 0.780 | 0.102 | 0.692 | 0.423 | 0.696 | 0.535 |



|                               |                   |       |       |       |       |       |       |
|-------------------------------|-------------------|-------|-------|-------|-------|-------|-------|
| Food_component_Plant          |                   |       |       |       |       |       |       |
| Food_component_Plant          | saccharin         | 0.035 | 0.177 | 0.165 | 0.095 | 0.173 | 0.175 |
| Food_component_Plant          | stachydrine       | 0.906 | 0.957 | 0.958 | 0.435 | 0.859 | 0.144 |
| Food_component_Plant          | thymol sulfate    | 0.281 | 0.068 | 0.056 | 0.749 | 0.111 | 0.588 |
| Sugar_sugar_substitute_starch | erythritol        | 0.553 | 0.858 | 0.603 | 0.316 | 0.132 | 0.777 |
| Tobacco_metabolite            | cotinine          | 0.161 | 0.906 | 0.983 | 0.549 | 0.196 | 0.930 |
| Xanthine_metabolism           | 1,7-dimethylurate | 0.258 | 0.662 | 0.835 | 0.118 | 0.121 | 0.461 |
| Xanthine_metabolism           | 1-methylurate     | 0.072 | 0.613 | 0.061 | 0.035 | 0.541 | 0.987 |
| Xanthine_metabolism           | 1-methylxanthine  | 0.020 | 0.021 | 0.120 | 0.009 | 0.531 | 0.069 |
| Xanthine_metabolism           | 3-methylxanthine  | 0.572 | 0.117 | 0.066 | 0.880 | 0.130 | 0.044 |
| Xanthine_metabolism           | 7-methylxanthine  | 0.235 | 0.514 | 0.752 | 0.838 | 0.635 | 0.076 |
| Xanthine_metabolism           | caffeine          | 0.676 | 0.679 | 0.247 | 0.547 | 0.139 | 0.893 |
| Xanthine_metabolism           | paraxanthine      | 0.386 | 0.870 | 0.653 | 0.167 | 0.188 | 0.946 |
| Xanthine_metabolism           | theobromine       | 0.244 | 0.217 | 0.834 | 0.893 | 0.113 | 0.106 |
| Xanthine_metabolism           | theophylline      | 0.262 | 0.927 | 0.464 | 0.167 | 0.623 | 0.580 |

<sup>1</sup> ANCOVA was used to calculate P values for the likelihood of significant differences between individual metabolites. For each metabolite, the post-intervention value of the log2 ion intensity was used as the response variable and the pre-intervention value was used as a covariate. Gender, diet and genotype were factor variables and their main effects and interaction were estimated in the model. Yellow denotes P value <0.05.

**SUPPLEMENTAL TABLE S5**

P values of differences in metabolites for genotypes 1 and 2 before and after the study in the HG broccoli arm (n=19)

| SUPER PATHWAY | SUB PATHWAY                              | BIOCHEMICAL                 | Pre 1 v 2          | Post 1 v2 | 1 Pre post | 2 Pre post         |
|---------------|------------------------------------------|-----------------------------|--------------------|-----------|------------|--------------------|
| Amino acid    | Glycine, serine and threonine metabolism | glycine                     | 0.943 <sup>1</sup> | 0.712     | 0.818      | 0.911              |
| Amino acid    | Glycine, serine and threonine metabolism | sarcosine (N-Methylglycine) | 0.712              | 0.215     | 0.072      | 0.548              |
| Amino acid    | Glycine, serine and threonine metabolism | dimethylglycine             | 0.421              | 0.495     | 0.434      | 0.994              |
| Amino acid    | Glycine, serine and threonine metabolism | N-acetylglycine             | 0.041 <sup>1</sup> | 0.454     | 0.168      | 0.032 <sup>1</sup> |
| Amino acid    | Glycine, serine and threonine metabolism | beta-hydroxypyruvate        | 0.488              | 0.137     | 0.896      | 0.194              |
| Amino acid    | Glycine, serine and threonine metabolism | serine                      | 0.625              | 0.948     | 0.527      | 0.838              |
| Amino acid    | Glycine, serine and threonine metabolism | threonine                   | 0.045 <sup>1</sup> | 0.055     | 0.275      | 0.001 <sup>1</sup> |
| Amino acid    | Glycine, serine and threonine metabolism | N-acetylthreonine           | 0.058              | 0.797     | 0.468      | 0.082              |
| Amino acid    | Glycine, serine and threonine metabolism | betaine                     | 0.825              | 0.151     | 0.084      | 0.111              |
| Amino acid    | Alanine and aspartate metabolism         | aspartate                   | 0.151              | 0.786     | 0.014      | 0.669              |
| Amino acid    | Alanine and aspartate metabolism         | asparagine                  | 0.573              | 0.834     | 0.642      | 0.864              |
| Amino acid    | Alanine and aspartate metabolism         | N-acetyl-beta-alanine       | 0.851              | 0.061     | 0.634      | 0.191              |
| Amino acid    | Alanine and aspartate metabolism         | alanine                     | 0.456              | 0.907     | 0.335      | 0.978              |
| Amino acid    | Alanine and aspartate metabolism         | N-acetylalanine             | 0.022              | 0.166     | 0.291      | 0.037              |
| Amino acid    | Glutamate metabolism                     | glutamate                   | 0.193              | 0.918     | 0.298      | 0.753              |
| Amino acid    | Glutamate metabolism                     | glutamine                   | 0.054              | 0.423     | 0.749      | 0.008              |
| Amino acid    | Glutamate metabolism                     | pyroglutamine*              | 0.521              | 0.468     | 0.634      | 0.687              |
| Amino acid    | Histidine metabolism                     | histidine                   | 0.715              | 0.020     | 0.695      | 0.006              |
| Amino acid    | Histidine metabolism                     | 3-methylhistidine           | 0.059              | 0.007     | 0.846      | 0.744              |
| Amino acid    | Lysine metabolism                        | lysine                      | 0.681              | 0.154     | 0.549      | 0.032              |
| Amino acid    | Lysine metabolism                        | pipecolate                  | 0.414              | 0.508     | 0.785      | 0.869              |
| Amino acid    | Lysine metabolism                        | N6-acetyllysine             | 0.267              | 0.463     | 0.537      | 0.998              |

|            |                                           |                                     |       |       |       |       |
|------------|-------------------------------------------|-------------------------------------|-------|-------|-------|-------|
| Amino acid | Lysine metabolism                         | glutaroyl carnitine                 | 0.808 | 0.680 | 0.256 | 0.658 |
| Amino acid | Phenylalanine & tyrosine metabolism       | phenyllactate (PLA)                 | 0.989 | 0.160 | 0.239 | 0.314 |
| Amino acid | Phenylalanine & tyrosine metabolism       | phenylalanine                       | 0.048 | 0.482 | 0.872 | 0.088 |
| Amino acid | Phenylalanine & tyrosine metabolism       | phenylacetate                       | 0.023 | 0.565 | 0.963 | 0.066 |
| Amino acid | Phenylalanine & tyrosine metabolism       | p-cresol sulfate                    | 0.256 | 0.510 | 0.291 | 0.275 |
| Amino acid | Phenylalanine & tyrosine metabolism       | o-cresol sulfate                    | 0.089 | 0.287 | 0.341 | 0.852 |
| Amino acid | Phenylalanine & tyrosine metabolism       | tyrosine                            | 0.083 | 0.240 | 0.174 | 0.017 |
| Amino acid | Phenylalanine & tyrosine metabolism       | 3-(4-hydroxyphenyl)lactate          | 0.403 | 0.372 | 0.692 | 0.067 |
| Amino acid | Phenylalanine & tyrosine metabolism       | 4-hydroxyphenylpyruvate             | 0.353 | 0.843 | 0.570 | 0.085 |
| Amino acid | Phenylalanine & tyrosine metabolism       | 4-hydroxyphenylacetate              | 0.223 | 0.203 | 0.327 | 0.459 |
| Amino acid | Phenylalanine & tyrosine metabolism       | 3-hydroxyphenylacetate              | 0.252 | 0.812 | 0.341 | 0.846 |
| Amino acid | Phenylalanine & tyrosine metabolism       | 3-methoxytyrosine                   | 0.919 | 0.761 | 0.861 | 0.739 |
| Amino acid | Phenylalanine & tyrosine metabolism       | phenylacetylglutamine               | 0.253 | 0.980 | 0.119 | 0.885 |
| Amino acid | Phenylalanine & tyrosine metabolism       | 3-phenylpropionate (hydrocinnamate) | 0.250 | 0.004 | 0.883 | 0.122 |
| Amino acid | Phenylalanine & tyrosine metabolism       | phenol sulfate                      | 0.081 | 0.153 | 0.187 | 0.817 |
| Amino acid | Tryptophan metabolism                     | kynurenine                          | 0.606 | 0.590 | 0.374 | 0.230 |
| Amino acid | Tryptophan metabolism                     | tryptophan                          | 0.039 | 0.860 | 0.557 | 0.035 |
| Amino acid | Tryptophan metabolism                     | indolelactate                       | 0.219 | 0.748 | 0.730 | 0.546 |
| Amino acid | Tryptophan metabolism                     | indoleacetate                       | 0.846 | 0.336 | 0.202 | 0.513 |
| Amino acid | Tryptophan metabolism                     | tryptophan betaine                  | 0.331 | 0.597 | 0.848 | 0.116 |
| Amino acid | Tryptophan metabolism                     | serotonin (5HT)                     | 0.769 | 0.279 | 0.263 | 0.565 |
| Amino acid | Tryptophan metabolism                     | C-glycosyltryptophan*               | 0.179 | 0.424 | 0.602 | 0.686 |
| Amino acid | Tryptophan metabolism                     | 3-indoxyl sulfate                   | 0.014 | 0.693 | 0.208 | 0.043 |
| Amino acid | Tryptophan metabolism                     | indolepropionate                    | 0.070 | 0.074 | 0.459 | 0.709 |
| Amino acid | Valine, leucine and isoleucine metabolism | 3-methyl-2-oxobutyrates             | 0.030 | 0.006 | 0.146 | 0.001 |
| Amino acid | Valine, leucine and isoleucine metabolism | 3-methyl-2-oxovalerate              | 0.457 | 0.053 | 0.136 | 0.015 |
| Amino acid | Valine, leucine and isoleucine metabolism | beta-hydroxyisovalerate             | 0.127 | 0.639 | 0.738 | 0.201 |

|            |                                               |                                   |       |       |       |       |
|------------|-----------------------------------------------|-----------------------------------|-------|-------|-------|-------|
| Amino acid | Valine, leucine and isoleucine metabolism     | alpha-hydroxyisocaproate          | 0.917 | 0.004 | 0.009 | 0.042 |
| Amino acid | Valine, leucine and isoleucine metabolism     | isoleucine                        | 0.805 | 0.890 | 0.156 | 0.251 |
| Amino acid | Valine, leucine and isoleucine metabolism     | leucine                           | 0.187 | 0.883 | 0.591 | 0.194 |
| Amino acid | Valine, leucine and isoleucine metabolism     | valine                            | 0.621 | 0.946 | 0.712 | 0.701 |
| Amino acid | Valine, leucine and isoleucine metabolism     | 2-hydroxyisobutyrate              | 0.502 | 0.896 | 0.169 | 0.693 |
| Amino acid | Valine, leucine and isoleucine metabolism     | 3-hydroxyisobutyrate              | 0.066 | 0.719 | 0.234 | 0.396 |
| Amino acid | Valine, leucine and isoleucine metabolism     | 4-methyl-2-oxopentanoate          | 0.347 | 0.046 | 0.336 | 0.002 |
| Amino acid | Valine, leucine and isoleucine metabolism     | alpha-hydroxyisovalerate          | 0.304 | 0.890 | 0.347 | 0.336 |
| Amino acid | Valine, leucine and isoleucine metabolism     | isobutyrylcarnitine               | 0.286 | 0.945 | 0.195 | 0.564 |
| Amino acid | Valine, leucine and isoleucine metabolism     | 2-hydroxy-3-methylvalerate        | 0.272 | 0.261 | 0.028 | 0.021 |
| Amino acid | Valine, leucine and isoleucine metabolism     | 2-methylbutyrylcarnitine          | 0.050 | 0.261 | 0.380 | 0.818 |
| Amino acid | Valine, leucine and isoleucine metabolism     | isovalerylcarnitine               | 0.724 | 0.688 | 0.854 | 0.222 |
| Amino acid | Valine, leucine and isoleucine metabolism     | hydroxyisovaleroyl carnitine      | 0.005 | 0.297 | 0.072 | 0.113 |
| Amino acid | Valine, leucine and isoleucine metabolism     | tiglyl carnitine                  | 0.007 | 0.465 | 0.127 | 0.884 |
| Amino acid | Cysteine, methionine, SAM, taurine metabolism | cysteine                          | 0.093 | 0.876 | 0.872 | 0.259 |
| Amino acid | Cysteine, methionine, SAM, taurine metabolism | S-methylcysteine                  | 0.870 | 0.398 | 0.173 | 0.073 |
| Amino acid | Cysteine, methionine, SAM, taurine metabolism | cystine                           | 0.782 | 0.779 | 0.591 | 0.478 |
| Amino acid | Cysteine, methionine, SAM, taurine metabolism | N-formylmethionine                | 0.002 | 0.906 | 0.150 | 0.024 |
| Amino acid | Cysteine, methionine, SAM, taurine metabolism | methionine                        | 0.186 | 0.227 | 0.830 | 0.034 |
| Amino acid | Cysteine, methionine, SAM, taurine metabolism | N-acetylmethionine                | 0.063 | 0.646 | 0.720 | 0.053 |
| Amino acid | Cysteine, methionine, SAM, taurine metabolism | 2-hydroxybutyrate (AHB)           | 0.050 | 0.434 | 0.054 | 0.068 |
| Amino acid | Urea cycle; arginine-, proline-, metabolism   | symmetric dimethylarginine (SDMA) | 0.751 | 0.513 | 0.618 | 0.883 |
| Amino acid | Urea cycle; arginine-, proline-, metabolism   | arginine                          | 0.580 | 0.262 | 0.693 | 0.022 |
| Amino acid | Urea cycle; arginine-, proline-, metabolism   | ornithine                         | 0.952 | 0.925 | 0.605 | 0.658 |
| Amino acid | Urea cycle; arginine-, proline-, metabolism   | urea                              | 0.027 | 0.774 | 0.156 | 0.067 |
| Amino acid | Urea cycle; arginine-, proline-, metabolism   | proline                           | 0.797 | 0.426 | 0.240 | 0.132 |
| Amino acid | Urea cycle; arginine-, proline-, metabolism   | citrulline                        | 0.966 | 0.993 | 0.539 | 0.372 |

|              |                                                              |                              |       |       |         |       |
|--------------|--------------------------------------------------------------|------------------------------|-------|-------|---------|-------|
| Amino acid   | Urea cycle; arginine-, proline-, metabolism                  | N-acetylornithine            | 0.258 | 0.195 | 0.343   | 0.589 |
| Amino acid   | Urea cycle; arginine-, proline-, metabolism                  | N-methyl proline             | 0.757 | 0.630 | 0.778   | 0.970 |
| Amino acid   | Urea cycle; arginine-, proline-, metabolism                  | trans-4-hydroxyproline       | 0.084 | 0.184 | 0.665   | 0.485 |
| Amino acid   | Creatine metabolism                                          | creatine                     | 0.801 | 0.282 | 0.759   | 0.055 |
| Amino acid   | Creatine metabolism                                          | creatinine                   | 0.041 | 0.310 | 0.025   | 0.754 |
| Amino acid   | Butanoate metabolism                                         | 2-aminobutyrate              | 0.243 | 0.841 | 0.410   | 0.645 |
| Amino acid   | Guanidino and acetamido metabolism                           | 4-acetamidobutanoate         | 0.209 | 0.292 | 0.608   | 0.328 |
| Amino acid   | Glutathione metabolism                                       | 5-oxoproline                 | 0.136 | 0.628 | 0.138   | 0.190 |
| Amino acid   | Glutathione metabolism                                       | glutathione, oxidized (GSSG) | 0.506 | 0.688 | 0.992   | 0.493 |
| Peptide      | Dipeptide                                                    | aspartylphenylalanine        | nd    | nd    | nd      | nd    |
| Peptide      | Dipeptide                                                    | pro-hydroxy-pro              | 0.282 | 0.306 | 0.568   | 0.354 |
| Peptide      | Dipeptide                                                    | phenylalanylphenylalanine    | 0.073 | 0.160 | 0.627   | 0.270 |
| Peptide      | Dipeptide                                                    | cyclo(leu-pro)               | 0.993 | 0.291 | 0.053   | 0.640 |
| Peptide      | gamma-glutamyl                                               | gamma-glutamylvaline         | 0.968 | 0.649 | 0.605   | 0.843 |
| Peptide      | gamma-glutamyl                                               | gamma-glutamylleucine        | 0.605 | 0.757 | 0.160   | 0.502 |
| Peptide      | gamma-glutamyl                                               | gamma-glutamylisoleucine*    | 0.901 | 0.465 | 0.222   | 0.885 |
| Peptide      | gamma-glutamyl                                               | gamma-glutamylmethionine     | 0.898 | 0.888 | 0.402   | 0.590 |
| Peptide      | gamma-glutamyl                                               | gamma-glutamylglutamine      | 0.607 | 0.389 | 0.136   | 0.547 |
| Peptide      | gamma-glutamyl                                               | gamma-glutamylphenylalanine  | 0.938 | 0.162 | 0.929   | 0.009 |
| Peptide      | gamma-glutamyl                                               | gamma-glutamyltyrosine       | 0.760 | 0.431 | 0.339   | 0.275 |
| Peptide      | gamma-glutamyl                                               | gamma-glutamylalanine        | 0.689 | 0.317 | 0.840   | 0.488 |
| Peptide      | Polypeptide                                                  | bradykinin                   | 0.016 | 0.252 | #DIV/0! | 0.351 |
| Peptide      | Polypeptide                                                  | bradykinin, hydroxy-pro(3)   | 1.000 | 0.252 | #DIV/0! | 0.351 |
| Carbohydrate | Aminosugars metabolism                                       | erythronate*                 | 0.025 | 0.846 | 0.058   | 0.308 |
| Carbohydrate | Aminosugars metabolism                                       | fucose                       | 0.421 | 0.324 | 0.655   | 0.947 |
| Carbohydrate | Fructose, mannose, galactose, starch, and sucrose metabolism | fructose                     | 0.770 | 0.387 | 0.229   | 0.495 |
| Carbohydrate | Fructose, mannose, galactose, starch, and sucrose metabolism | maltose                      | 0.406 | 0.428 | 0.381   | 0.276 |

|              |                                                              |                              |       |       |       |       |
|--------------|--------------------------------------------------------------|------------------------------|-------|-------|-------|-------|
| Carbohydrate | Fructose, mannose, galactose, starch, and sucrose metabolism | mannose                      | 0.734 | 0.880 | 0.934 | 0.673 |
| Carbohydrate | Fructose, mannose, galactose, starch, and sucrose metabolism | maltotriose                  | 0.422 | 0.700 | 0.351 | 0.897 |
| Carbohydrate | Fructose, mannose, galactose, starch, and sucrose metabolism | maltotetraose                | 0.445 | 0.636 | 0.677 | 0.365 |
| Carbohydrate | Fructose, mannose, galactose, starch, and sucrose metabolism | methyl-beta-glucopyranoside  | 0.258 | 0.285 | 0.287 | 0.282 |
| Carbohydrate | Glycolysis, gluconeogenesis, pyruvate metabolism             | 1,5-anhydroglucitol (1,5-AG) | 0.507 | 0.965 | 0.211 | 0.488 |
| Carbohydrate | Glycolysis, gluconeogenesis, pyruvate metabolism             | glycerate                    | 0.342 | 0.220 | 0.119 | 0.441 |
| Carbohydrate | Glycolysis, gluconeogenesis, pyruvate metabolism             | glucose                      | 0.406 | 0.709 | 0.369 | 0.734 |
| Carbohydrate | Glycolysis, gluconeogenesis, pyruvate metabolism             | 1,6-anhydroglucose           | 0.281 | 0.179 | 0.803 | 0.988 |
| Carbohydrate | Glycolysis, gluconeogenesis, pyruvate metabolism             | 3-phosphoglycerate           | 0.578 | 0.070 | 0.258 | 0.126 |
| Carbohydrate | Glycolysis, gluconeogenesis, pyruvate metabolism             | pyruvate                     | 0.744 | 0.313 | 0.846 | 0.727 |
| Carbohydrate | Glycolysis, gluconeogenesis, pyruvate metabolism             | lactate                      | 0.715 | 0.856 | 0.846 | 0.930 |
| Carbohydrate | Glycolysis, gluconeogenesis, pyruvate metabolism             | glucuronate                  | 0.875 | 0.149 | 0.906 | 0.251 |
| Carbohydrate | Glyoxylate and dicarboxylate metabolism                      | oxalate (ethanedioate)       | 0.914 | 0.858 | 0.288 | 0.499 |
| Carbohydrate | Nucleotide sugars, pentose metabolism                        | arabitol                     | 0.135 | 0.047 | 0.317 | 0.912 |
| Carbohydrate | Nucleotide sugars, pentose metabolism                        | ribitol                      | 0.100 | 0.699 | 0.717 | 0.569 |
| Carbohydrate | Nucleotide sugars, pentose metabolism                        | threitol                     | 0.271 | 0.496 | 0.725 | 0.498 |
| Carbohydrate | Nucleotide sugars, pentose metabolism                        | arabinose                    | 0.865 | 0.869 | 0.306 | 0.334 |
| Carbohydrate | Nucleotide sugars, pentose metabolism                        | xylose                       | 0.779 | 0.287 | 0.456 | 0.650 |
| Carbohydrate | Advanced glycation end-product                               | erythrose                    | 0.661 | 0.291 | 0.915 | 0.470 |
| Energy       | Krebs cycle                                                  | citrate                      | 0.162 | 0.485 | 0.057 | 0.940 |
| Energy       | Krebs cycle                                                  | alpha-ketoglutarate          | 0.390 | 0.677 | 0.860 | 0.318 |
| Energy       | Krebs cycle                                                  | succinate                    | 0.010 | 0.901 | 0.490 | 0.026 |
| Energy       | Krebs cycle                                                  | succinylcarnitine            | 0.233 | 0.783 | 0.200 | 0.287 |
| Energy       | Krebs cycle                                                  | fumarate                     | 0.039 | 0.867 | 0.181 | 0.554 |
| Energy       | Krebs cycle                                                  | malate                       | 0.027 | 0.785 | 0.080 | 0.337 |
| Energy       | Oxidative phosphorylation                                    | acetylphosphate              | 0.886 | 0.139 | 0.700 | 0.198 |

|        |                           |                                            |       |       |       |       |
|--------|---------------------------|--------------------------------------------|-------|-------|-------|-------|
| Energy | Oxidative phosphorylation | phosphate                                  | 0.428 | 0.062 | 0.095 | 0.290 |
| Energy | Oxidative phosphorylation | pyrophosphate (PPi)                        | 0.939 | 0.598 | 0.476 | 0.176 |
| Lipid  | Essential fatty acid      | linoleate (18:2n6)                         | 0.003 | 0.358 | 0.012 | 0.004 |
| Lipid  | Essential fatty acid      | linolenate [alpha or gamma; (18:3n3 or 6)] | 0.007 | 0.490 | 0.008 | 0.000 |
| Lipid  | Essential fatty acid      | dihomo-linolenate (20:3n3 or n6)           | 0.000 | 0.009 | 0.139 | 0.066 |
| Lipid  | Essential fatty acid      | eicosapentaenoate (EPA; 20:5n3)            | 0.080 | 0.066 | 0.049 | 0.022 |
| Lipid  | Essential fatty acid      | docosapentaenoate (n3 DPA; 22:5n3)         | 0.008 | 0.169 | 0.001 | 0.002 |
| Lipid  | Essential fatty acid      | docosahexaenoate (DHA; 22:6n3)             | 0.031 | 0.242 | 0.033 | 0.060 |
| Lipid  | Short chain fatty acid    | valerate                                   | 0.700 | 0.534 | 0.673 | 0.624 |
| Lipid  | Medium chain fatty acid   | caproate (6:0)                             | 0.833 | 0.070 | 0.009 | 0.659 |
| Lipid  | Medium chain fatty acid   | heptanoate (7:0)                           | 0.176 | 0.987 | 0.396 | 0.107 |
| Lipid  | Medium chain fatty acid   | caprylate (8:0)                            | 0.518 | 0.176 | 0.100 | 0.566 |
| Lipid  | Medium chain fatty acid   | pelargonate (9:0)                          | 0.541 | 0.172 | 0.215 | 0.190 |
| Lipid  | Medium chain fatty acid   | caprate (10:0)                             | 0.651 | 0.034 | 0.035 | 0.848 |
| Lipid  | Medium chain fatty acid   | undecanoate (11:0)                         | 0.320 | 0.679 | 0.930 | 0.588 |
| Lipid  | Medium chain fatty acid   | 10-undecenoate (11:1n1)                    | 0.396 | 0.155 | 0.032 | 0.571 |
| Lipid  | Medium chain fatty acid   | laurate (12:0)                             | 0.986 | 0.140 | 0.024 | 0.992 |
| Lipid  | Medium chain fatty acid   | 5-dodecenoate (12:1n7)                     | 0.048 | 0.650 | 0.050 | 0.009 |
| Lipid  | Long chain fatty acid     | myristate (14:0)                           | 0.023 | 0.038 | 0.002 | 0.003 |
| Lipid  | Long chain fatty acid     | myristoleate (14:1n5)                      | 0.055 | 0.942 | 0.037 | 0.110 |
| Lipid  | Long chain fatty acid     | pentadecanoate (15:0)                      | 0.032 | 0.000 | 0.002 | 0.000 |
| Lipid  | Long chain fatty acid     | palmitate (16:0)                           | 0.000 | 0.014 | 0.000 | 0.000 |
| Lipid  | Long chain fatty acid     | palmitoleate (16:1n7)                      | 0.057 | 0.577 | 0.083 | 0.003 |
| Lipid  | Long chain fatty acid     | margarate (17:0)                           | 0.000 | 0.035 | 0.001 | 0.000 |
| Lipid  | Long chain fatty acid     | 10-heptadecenoate (17:1n7)                 | 0.015 | 0.130 | 0.008 | 0.001 |
| Lipid  | Long chain fatty acid     | stearate (18:0)                            | 0.000 | 0.038 | 0.002 | 0.000 |
| Lipid  | Long chain fatty acid     | oleate (18:1n9)                            | 0.018 | 0.617 | 0.138 | 0.016 |

|       |                                              |                                                      |       |       |       |       |
|-------|----------------------------------------------|------------------------------------------------------|-------|-------|-------|-------|
| Lipid | Long chain fatty acid                        | cis-vaccenate (18:1n7)                               | 0.009 | 0.894 | 0.016 | 0.021 |
| Lipid | Long chain fatty acid                        | stearidonate (18:4n3)                                | 0.020 | 0.461 | 0.001 | 0.586 |
| Lipid | Long chain fatty acid                        | nonadecanoate (19:0)                                 | 0.000 | 0.052 | 0.024 | 0.001 |
| Lipid | Long chain fatty acid                        | 10-nonadecenoate (19:1n9)                            | 0.007 | 0.075 | 0.002 | 0.001 |
| Lipid | Long chain fatty acid                        | eicosenoate (20:1n9 or 11)                           | 0.013 | 0.081 | 0.006 | 0.002 |
| Lipid | Long chain fatty acid                        | dihomo-linoleate (20:2n6)                            | 0.009 | 0.043 | 0.001 | 0.000 |
| Lipid | Long chain fatty acid                        | arachidonate (20:4n6)                                | 0.002 | 0.029 | 0.017 | 0.000 |
| Lipid | Long chain fatty acid                        | adrenate (22:4n6)                                    | 0.004 | 0.009 | 0.002 | 0.004 |
| Lipid | Fatty acid, ester                            | n-Butyl Oleate                                       | 0.126 | 0.296 | 0.165 | 0.786 |
| Lipid | Fatty acid, monohydroxy                      | 2-hydroxyoctanoate                                   | 0.497 | 0.716 | 0.362 | 0.557 |
| Lipid | Fatty acid, monohydroxy                      | 3-hydroxyoctanoate                                   | 0.008 | 0.227 | 0.245 | 0.348 |
| Lipid | Fatty acid, monohydroxy                      | 3-hydroxydecanoate                                   | 0.006 | 0.844 | 0.041 | 0.014 |
| Lipid | Fatty acid, monohydroxy                      | 2-hydroxystearate                                    | 0.000 | 0.001 | 0.000 | 0.002 |
| Lipid | Fatty acid, monohydroxy                      | 2-hydroxypalmitate                                   | 0.001 | 0.000 | 0.000 | 0.002 |
| Lipid | Fatty acid, monohydroxy                      | 13-HODE + 9-HODE                                     | 0.057 | 0.246 | 0.003 | 0.032 |
| Lipid | Fatty acid, dicarboxylate                    | azelate (nonanedioate)                               | 0.085 | 0.166 | 0.518 | 0.733 |
| Lipid | Fatty acid, dicarboxylate                    | dodecanedioate                                       | 0.154 | 0.317 | 0.058 | 0.309 |
| Lipid | Fatty acid, dicarboxylate                    | tetradecanedioate                                    | 0.030 | 0.615 | 0.010 | 0.048 |
| Lipid | Fatty acid, dicarboxylate                    | hexadecanedioate                                     | 0.039 | 0.561 | 0.012 | 0.030 |
| Lipid | Fatty acid, dicarboxylate                    | octadecanedioate                                     | 0.119 | 0.850 | 0.222 | 0.550 |
| Lipid | Fatty acid, dicarboxylate                    | 3-carboxy-4-methyl-5-propyl-2-furanpropanoate (CMPF) | 0.153 | 0.161 | 0.837 | 0.707 |
| Lipid | Fatty acid, branched                         | 13-methylmyristic acid                               | 0.004 | 0.014 | 0.012 | 0.004 |
| Lipid | Fatty acid, branched                         | 15-methylpalmitate (isobar with 2-methylpalmitate)   | 0.005 | 0.001 | 0.011 | 0.000 |
| Lipid | Fatty acid, branched                         | 17-methylstearate                                    | 0.026 | 0.178 | 0.319 | 0.001 |
| Lipid | Fatty acid metabolism (also BCAA metabolism) | propionylcarnitine                                   | 0.291 | 0.693 | 0.827 | 0.417 |
| Lipid | Fatty acid metabolism (also BCAA metabolism) | butyrylcarnitine                                     | 0.020 | 0.289 | 0.030 | 0.463 |
| Lipid | Fatty acid metabolism                        | valerylcarnitine                                     | 0.300 | 0.340 | 0.484 | 0.462 |



|       |                         |                              |       |       |       |       |
|-------|-------------------------|------------------------------|-------|-------|-------|-------|
| Lipid | Fatty acid metabolism   | isovalerate                  | 0.952 | 0.013 | 0.766 | 0.147 |
| Lipid | Carnitine metabolism    | deoxycarnitine               | 0.143 | 0.241 | 0.265 | 0.407 |
| Lipid | Carnitine metabolism    | carnitine                    | 0.358 | 0.499 | 0.461 | 0.253 |
| Lipid | Carnitine metabolism    | 3-dehydrocarnitine*          | 0.708 | 0.978 | 0.464 | 0.837 |
| Lipid | Carnitine metabolism    | acetylcarnitine              | 0.021 | 0.436 | 0.092 | 0.477 |
| Lipid | Carnitine metabolism    | hexanoylcarnitine            | 0.000 | 0.259 | 0.015 | 0.991 |
| Lipid | Carnitine metabolism    | octanoylcarnitine            | 0.002 | 0.130 | 0.039 | 0.304 |
| Lipid | Carnitine metabolism    | decanoylcarnitine            | 0.013 | 0.191 | 0.069 | 0.411 |
| Lipid | Carnitine metabolism    | cis-4-decenoyl carnitine     | 0.027 | 0.134 | 0.110 | 0.321 |
| Lipid | Carnitine metabolism    | laurylcarnitine              | 0.102 | 0.299 | 0.040 | 0.255 |
| Lipid | Carnitine metabolism    | palmitoylcarnitine           | 0.605 | 0.325 | 0.208 | 0.010 |
| Lipid | Carnitine metabolism    | stearoylcarnitine            | 0.941 | 0.627 | 0.440 | 0.153 |
| Lipid | Carnitine metabolism    | oleoylcarnitine              | 0.267 | 0.215 | 0.187 | 0.022 |
| Lipid | Bile acid metabolism    | cholate                      | 0.646 | 0.369 | 0.980 | 0.600 |
| Lipid | Bile acid metabolism    | glycocholate                 | 0.101 | 0.908 | 0.152 | 0.298 |
| Lipid | Bile acid metabolism    | chenodeoxycholate            | 0.083 | 0.491 | 0.631 | 0.056 |
| Lipid | Bile acid metabolism    | deoxycholate                 | 0.440 | 0.795 | 0.702 | 0.782 |
| Lipid | Bile acid metabolism    | glycodeoxycholate            | 0.390 | 0.780 | 0.988 | 0.305 |
| Lipid | Bile acid metabolism    | glycochenodeoxycholate       | 0.584 | 0.633 | 0.578 | 0.490 |
| Lipid | Bile acid metabolism    | glycolithocholate sulfate*   | 0.657 | 0.777 | 0.281 | 0.049 |
| Lipid | Bile acid metabolism    | tauroolithocholate 3-sulfate | 0.683 | 0.154 | 0.355 | 0.775 |
| Lipid | Bile acid metabolism    | glycocholenate sulfate*      | 0.982 | 0.053 | 0.556 | 0.027 |
| Lipid | Bile acid metabolism    | taurocholenate sulfate*      | 0.391 | 0.923 | 0.979 | 0.298 |
| Lipid | Bile acid metabolism    | glycoursodeoxycholate        | 0.556 | 0.833 | 0.710 | 0.612 |
| Lipid | Glycerolipid metabolism | phosphoethanolamine          | 0.738 | 0.150 | 0.570 | 0.094 |
| Lipid | Glycerolipid metabolism | choline                      | 0.924 | 0.351 | 0.732 | 0.401 |
| Lipid | Glycerolipid metabolism | glycerol 3-phosphate (G3P)   | 0.056 | 0.151 | 0.317 | 0.040 |

|       |                         |                                              |       |       |       |       |
|-------|-------------------------|----------------------------------------------|-------|-------|-------|-------|
| Lipid | Glycerolipid metabolism | glycerophosphorylcholine (GPC)               | 0.981 | 0.484 | 0.446 | 0.881 |
| Lipid | Glycerolipid metabolism | trimethylamine N-oxide                       | nd    | nd    | nd    | nd    |
| Lipid | Inositol metabolism     | myo-inositol                                 | 0.493 | 0.153 | 0.838 | 0.511 |
| Lipid | Inositol metabolism     | chiro-inositol                               | 0.356 | 0.683 | 0.988 | 0.682 |
| Lipid | Ketone bodies           | 3-hydroxybutyrate (BHBA)                     | 0.075 | 0.861 | 0.188 | 0.325 |
| Lipid | Lysolipid               | 1-palmitoylglycerophosphoethanolamine        | 0.260 | 0.007 | 0.787 | 0.004 |
| Lipid | Lysolipid               | 2-palmitoylglycerophosphoethanolamine*       | 0.114 | 0.004 | 0.745 | 0.000 |
| Lipid | Lysolipid               | 1-stearoylglycerophosphoethanolamine         | 0.667 | 0.299 | 0.716 | 0.270 |
| Lipid | Lysolipid               | 1-oleoylglycerophosphoethanolamine           | 0.029 | 0.006 | 0.350 | 0.001 |
| Lipid | Lysolipid               | 2-oleoylglycerophosphoethanolamine*          | 0.227 | 0.060 | 0.580 | 0.023 |
| Lipid | Lysolipid               | 1-linoleoylglycerophosphoethanolamine*       | 0.550 | 0.976 | 0.157 | 1.000 |
| Lipid | Lysolipid               | 2-linoleoylglycerophosphoethanolamine*       | 0.572 | 0.006 | 0.491 | 0.044 |
| Lipid | Lysolipid               | 1-arachidonoylglycerophosphoethanolamine*    | 0.300 | 0.002 | 0.032 | 0.002 |
| Lipid | Lysolipid               | 2-arachidonoylglycerophosphoethanolamine*    | 0.749 | 0.959 | 0.057 | 0.545 |
| Lipid | Lysolipid               | 2-docosahexaenoylglycerophosphoethanolamine* | 0.426 | 0.312 | 0.005 | 0.204 |
| Lipid | Lysolipid               | 1-myristoylglycerophosphocholine             | 0.615 | 0.903 | 0.031 | 0.387 |
| Lipid | Lysolipid               | 2-myristoylglycerophosphocholine*            | 0.811 | 0.797 | 0.134 | 0.169 |
| Lipid | Lysolipid               | 1-pentadecanoylglycerophosphocholine*        | 0.548 | 0.562 | 0.089 | 0.445 |
| Lipid | Lysolipid               | 1-palmitoylglycerophosphocholine             | 0.650 | 0.914 | 0.046 | 0.552 |
| Lipid | Lysolipid               | 2-palmitoylglycerophosphocholine*            | 0.967 | 0.974 | 0.136 | 0.502 |
| Lipid | Lysolipid               | 1-palmitoleoylglycerophosphocholine*         | 0.064 | 0.492 | 0.069 | 0.791 |
| Lipid | Lysolipid               | 2-palmitoleoylglycerophosphocholine*         | 0.181 | 0.817 | 0.053 | 0.875 |
| Lipid | Lysolipid               | 1-heptadecanoylglycerophosphocholine         | 0.710 | 0.514 | 0.110 | 0.675 |
| Lipid | Lysolipid               | 1-stearoylglycerophosphocholine              | 0.609 | 0.797 | 0.315 | 0.797 |
| Lipid | Lysolipid               | 2-stearoylglycerophosphocholine*             | 0.297 | 0.853 | 0.068 | 0.979 |
| Lipid | Lysolipid               | 1-oleoylglycerophosphocholine                | 0.173 | 0.683 | 0.037 | 0.937 |
| Lipid | Lysolipid               | 2-oleoylglycerophosphocholine*               | 0.764 | 0.304 | 0.030 | 0.195 |

|       |                |                                                |       |       |       |       |
|-------|----------------|------------------------------------------------|-------|-------|-------|-------|
| Lipid | Lysolipid      | 1-linoleoylglycerophosphocholine               | 0.401 | 0.966 | 0.022 | 0.991 |
| Lipid | Lysolipid      | 2-linoleoylglycerophosphocholine*              | 0.207 | 0.395 | 0.046 | 0.735 |
| Lipid | Lysolipid      | 1-eicosadienoylglycerophosphocholine*          | 0.187 | 0.832 | 0.018 | 0.736 |
| Lipid | Lysolipid      | 1-eicosatrienoylglycerophosphocholine*         | 0.411 | 0.376 | 0.041 | 0.384 |
| Lipid | Lysolipid      | 1-arachidonoylglycerophosphocholine*           | 0.232 | 0.822 | 0.051 | 0.813 |
| Lipid | Lysolipid      | 2-arachidonoylglycerophosphocholine*           | 0.474 | 0.963 | 0.002 | 0.599 |
| Lipid | Lysolipid      | 1-docosapentaenoylglycerophosphocholine*       | 0.520 | 0.948 | 0.026 | 0.587 |
| Lipid | Lysolipid      | 1-docosahexaenoylglycerophosphocholine*        | 0.035 | 0.485 | 0.035 | 0.905 |
| Lipid | Lysolipid      | 2-docosahexaenoylglycerophosphocholine*        | 0.611 | 0.339 | 0.188 | 0.035 |
| Lipid | Lysolipid      | 1-stearoylglycerophosphoinositol               | 0.088 | 0.001 | 0.045 | 0.003 |
| Lipid | Lysolipid      | 1-arachidonoylglycerophosphoinositol*          | 0.105 | 0.000 | 0.003 | 0.003 |
| Lipid | Lysolipid      | 1-palmitoylplasmenylethanolamine*              | 0.248 | 0.058 | 0.052 | 0.061 |
| Lipid | Sphingolipid   | sphingosine                                    | 0.184 | 0.477 | 0.904 | 0.532 |
| Lipid | Sphingolipid   | palmitoyl sphingomyelin                        | 0.382 | 0.407 | 0.289 | 0.379 |
| Lipid | Sphingolipid   | stearoyl sphingomyelin                         | 0.366 | 0.668 | 0.394 | 0.415 |
| Lipid | Sterol/Steroid | lathosterol                                    | 0.256 | 0.354 | 0.704 | 0.945 |
| Lipid | Sterol/Steroid | squalene                                       | nd    | nd    | nd    | nd    |
| Lipid | Sterol/Steroid | cholesterol                                    | 0.167 | 0.341 | 0.040 | 0.377 |
| Lipid | Sterol/Steroid | dehydroisoandrosterone sulfate (DHEA-S)        | 0.550 | 0.552 | 0.035 | 0.001 |
| Lipid | Sterol/Steroid | epiandrosterone sulfate                        | 0.713 | 0.200 | 0.210 | 0.019 |
| Lipid | Sterol/Steroid | androsterone sulfate                           | 0.888 | 0.471 | 0.193 | 0.006 |
| Lipid | Sterol/Steroid | cortisol                                       | 0.365 | 0.376 | 0.478 | 0.722 |
| Lipid | Sterol/Steroid | cortisone                                      | 0.864 | 0.195 | 0.717 | 0.214 |
| Lipid | Sterol/Steroid | beta-sitosterol                                | 0.574 | 0.883 | 0.880 | 0.789 |
| Lipid | Sterol/Steroid | 7-alpha-hydroxy-3-oxo-4-cholestenoate (7-Hoca) | 0.035 | 0.989 | 0.040 | 0.038 |
| Lipid | Sterol/Steroid | 4-androsten-3beta,17beta-diol disulfate 1*     | 0.591 | 0.661 | 0.298 | 0.035 |
| Lipid | Sterol/Steroid | 4-androsten-3beta,17beta-diol disulfate 2*     | 0.808 | 0.367 | 0.458 | 0.003 |

|                        |                                                      |                                              |       |       |       |       |
|------------------------|------------------------------------------------------|----------------------------------------------|-------|-------|-------|-------|
| Lipid                  | Sterol/Steroid                                       | 5alpha-androstan-3beta,17beta-diol disulfate | 0.430 | 0.391 | 0.136 | 0.199 |
| Lipid                  | Sterol/Steroid                                       | 5alpha-pregnan-3beta,20alpha-diol disulfate  | 0.469 | 0.209 | 0.982 | 0.396 |
| Lipid                  | Sterol/Steroid                                       | pregnen-diol disulfate*                      | 0.832 | 0.911 | 0.679 | 0.045 |
| Lipid                  | Sterol/Steroid                                       | pregn steroid monosulfate*                   | 0.599 | 0.429 | 0.157 | 0.005 |
| Lipid                  | Sterol/Steroid                                       | andro steroid monosulfate 1*                 | 0.126 | 0.416 | 0.105 | 0.270 |
| Lipid                  | Sterol/Steroid                                       | andro steroid monosulfate 2*                 | 0.742 | 0.313 | 0.647 | 0.042 |
| Lipid                  | Sterol/Steroid                                       | 21-hydroxypregnenolone disulfate             | 0.550 | 0.410 | 0.432 | 0.001 |
| Lipid                  | Sterol/Steroid                                       | pregnenolone sulfate                         | 0.788 | 0.027 | 0.976 | 0.003 |
| Nucleotide             | Purine metabolism, (hypo)xanthine/inosine containing | xanthine                                     | 0.486 | 0.456 | 0.393 | 0.337 |
| Nucleotide             | Purine metabolism, (hypo)xanthine/inosine containing | hypoxanthine                                 | 0.973 | 0.033 | 0.564 | 0.264 |
| Nucleotide             | Purine metabolism, adenine containing                | N1-methyladenosine                           | 0.224 | 0.317 | 0.731 | 0.066 |
| Nucleotide             | Purine metabolism, adenine containing                | adenosine 5'-monophosphate (AMP)             | 0.954 | 0.615 | 0.525 | 0.713 |
| Nucleotide             | Purine metabolism, adenine containing                | adenosine 5'-diphosphate (ADP)               | 0.543 | 0.235 | 0.558 | 0.094 |
| Nucleotide             | Purine metabolism, guanine containing                | N1-methylguanosine                           | 0.287 | 0.128 | 0.140 | 0.154 |
| Nucleotide             | Purine metabolism, guanine containing                | N2,N2-dimethylguanosine                      | 0.909 | 0.871 | 0.002 | 0.187 |
| Nucleotide             | Purine metabolism, guanine containing                | N6-carbamoylthreonyladenosine                | 0.070 | 0.029 | 0.154 | 0.198 |
| Nucleotide             | Purine metabolism, urate metabolism                  | urate                                        | 0.010 | 0.852 | 0.025 | 0.001 |
| Nucleotide             | Pyrimidine metabolism, cytidine containing           | N4-acetylcytidine                            | 0.820 | 0.763 | 0.269 | 0.246 |
| Nucleotide             | Pyrimidine metabolism, uracil containing             | uridine                                      | 0.424 | 0.013 | 0.093 | 0.066 |
| Nucleotide             | Pyrimidine metabolism, uracil containing             | pseudouridine                                | 0.001 | 0.337 | 0.002 | 0.000 |
| Nucleotide             | Pyrimidine metabolism, uracil containing             | 5-methyluridine (ribothymidine)              | 0.170 | 0.018 | 0.012 | 0.034 |
| Nucleotide             | Purine and pyrimidine metabolism                     | methylphosphate                              | 0.102 | 0.643 | 0.411 | 0.202 |
| Cofactors and vitamins | Ascorbate and aldarate metabolism                    | threonate                                    | 0.182 | 0.467 | 0.425 | 0.078 |
| Cofactors and vitamins | Hemoglobin and porphyrin metabolism                  | heme*                                        | 0.391 | 0.155 | 0.828 | 0.648 |
| Cofactors and vitamins | Hemoglobin and porphyrin metabolism                  | L-urobilin                                   | 0.253 | 0.945 | 0.946 | 0.072 |
| Cofactors and vitamins | Hemoglobin and porphyrin metabolism                  | bilirubin (Z,Z)                              | 0.133 | 0.195 | 0.851 | 0.658 |

|                        |                                        |                                    |       |       |       |       |
|------------------------|----------------------------------------|------------------------------------|-------|-------|-------|-------|
| Cofactors and vitamins | Hemoglobin and porphyrin metabolism    | bilirubin (E,E)*                   | 0.003 | 0.166 | 0.195 | 0.091 |
| Cofactors and vitamins | Hemoglobin and porphyrin metabolism    | bilirubin (E,Z or Z,E)*            | 0.002 | 0.001 | 0.389 | 0.776 |
| Cofactors and vitamins | Hemoglobin and porphyrin metabolism    | biliverdin                         | 0.100 | 0.161 | 0.005 | 0.053 |
| Cofactors and vitamins | Nicotinate and nicotinamide metabolism | nicotinamide                       | 0.945 | 0.178 | 0.365 | 0.506 |
| Cofactors and vitamins | Nicotinate and nicotinamide metabolism | adenosine 5'diphosphoribose        | 0.460 | 0.051 | 0.490 | 0.011 |
| Cofactors and vitamins | Nicotinate and nicotinamide metabolism | trigonelline (N'-methylnicotinate) | 0.242 | 0.833 | 0.507 | 0.549 |
| Cofactors and vitamins | Pantothenate and CoA metabolism        | pantothenate                       | 0.597 | 0.524 | 0.717 | 0.476 |
| Cofactors and vitamins | Riboflavin metabolism                  | flavin adenine dinucleotide (FAD)  | 0.041 | 0.004 | 0.126 | 0.022 |
| Cofactors and vitamins | Tocopherol metabolism                  | alpha-tocopherol                   | 0.210 | 0.109 | 0.226 | 0.208 |
| Cofactors and vitamins | Tocopherol metabolism                  | gamma-CEHC                         | 0.676 | 0.841 | 0.642 | 0.963 |
| Cofactors and vitamins | Vitamin B6 metabolism                  | pyridoxate                         | 0.029 | 0.537 | 0.086 | 0.749 |
| Xenobiotics            | Benzoate metabolism                    | hippurate                          | 0.453 | 0.148 | 0.512 | 0.412 |
| Xenobiotics            | Benzoate metabolism                    | 2-hydroxyhippurate (salicylurate)  | 0.409 | 0.833 | 0.905 | 0.007 |
| Xenobiotics            | Benzoate metabolism                    | 3-hydroxyhippurate                 | 0.643 | 0.681 | 0.754 | 0.810 |
| Xenobiotics            | Benzoate metabolism                    | catechol sulfate                   | 0.222 | 0.937 | 0.361 | 0.639 |
| Xenobiotics            | Benzoate metabolism                    | benzoate                           | 0.098 | 0.697 | 0.064 | 0.436 |
| Xenobiotics            | Benzoate metabolism                    | methyl-4-hydroxybenzoate           | 0.845 | 0.640 | 0.206 | 0.427 |
| Xenobiotics            | Benzoate metabolism                    | 4-ethylphenylsulfate               | 0.845 | 0.817 | 0.790 | 0.633 |
| Xenobiotics            | Benzoate metabolism                    | 4-vinylphenol sulfate              | 0.215 | 0.042 | 0.909 | 0.450 |
| Xenobiotics            | Chemical                               | glycolate (hydroxyacetate)         | 0.049 | 0.724 | 0.183 | 0.206 |
| Xenobiotics            | Chemical                               | iminodiacetate (IDA)               | 0.091 | 0.130 | 0.088 | 0.173 |
| Xenobiotics            | Chemical                               | glycerol 2-phosphate               | 0.007 | 0.997 | 0.164 | 0.090 |
| Xenobiotics            | Chemical                               | 2-ethylhexanoate                   | 0.241 | 0.632 | 0.280 | 0.971 |
| Xenobiotics            | Chemical                               | diisopropanolamine                 | nd    | nd    | nd    | nd    |

|             |                      |                                     |       |       |       |       |
|-------------|----------------------|-------------------------------------|-------|-------|-------|-------|
| Xenobiotics | Drug                 | codeine                             | nd    | nd    | nd    | nd    |
| Xenobiotics | Drug                 | 4-acetaminophen sulfate             | 0.891 | 0.672 | 0.381 | 0.171 |
| Xenobiotics | Drug                 | 4-acetamidophenol                   | 0.298 | 0.252 | 0.341 | 0.351 |
| Xenobiotics | Drug                 | p-acetamidophenylglucuronide        | 0.535 | 0.252 | 0.341 | 0.176 |
| Xenobiotics | Drug                 | 2-hydroxyacetaminophen sulfate*     | 0.994 | 0.643 | 0.395 | 0.671 |
| Xenobiotics | Drug                 | 2-methoxyacetaminophen sulfate*     | 0.589 | 0.252 | 0.341 | 0.351 |
| Xenobiotics | Drug                 | 3-(cystein-S-yl)acetaminophen*      | 0.382 | 0.252 | 0.341 | 0.351 |
| Xenobiotics | Drug                 | 2-methoxyacetaminophen glucuronide* | 0.458 | 0.252 | 0.341 | 0.351 |
| Xenobiotics | Drug                 | ibuprofen                           | 0.295 | 0.670 | 0.872 | 0.377 |
| Xenobiotics | Drug                 | naproxen                            | nd    | nd    | nd    | nd    |
| Xenobiotics | Drug                 | desmethylnaproxen sulfate*          | nd    | nd    | nd    | nd    |
| Xenobiotics | Drug                 | pivaloylcarnitine                   | 0.480 | 0.196 | 0.318 | 0.341 |
| Xenobiotics | Drug                 | pseudoephedrine                     | nd    | nd    | nd    | nd    |
| Xenobiotics | Drug                 | quinine                             | 0.797 | 0.518 | 0.617 | 0.320 |
| Xenobiotics | EDTA                 | EDTA                                | 0.026 | 0.018 | 0.139 | 0.025 |
| Xenobiotics | Food component/Plant | saccharin                           | 0.088 | 0.364 | 0.172 | 0.114 |
| Xenobiotics | Food component/Plant | quininate                           | 0.103 | 0.680 | 0.056 | 0.471 |
| Xenobiotics | Food component/Plant | piperine                            | 0.161 | 0.265 | 0.179 | 0.382 |
| Xenobiotics | Food component/Plant | thymol sulfate                      | 0.995 | 0.206 | 0.187 | 0.046 |
| Xenobiotics | Food component/Plant | stachydrine                         | 0.542 | 0.146 | 0.111 | 0.919 |
| Xenobiotics | Food component/Plant | homostachydrine*                    | 0.464 | 0.476 | 0.232 | 0.149 |
| Xenobiotics | Food component/Plant | cinnamoylglycine                    | 0.641 | 0.206 | 0.485 | 0.077 |
| Xenobiotics | Xanthine metabolism  | caffeine                            | 0.561 | 0.765 | 0.959 | 0.110 |
| Xenobiotics | Xanthine metabolism  | paraxanthine                        | 0.509 | 0.900 | 0.298 | 0.287 |
| Xenobiotics | Xanthine metabolism  | theobromine                         | 0.577 | 0.593 | 0.247 | 0.216 |
| Xenobiotics | Xanthine metabolism  | theophylline                        | 0.139 | 0.172 | 0.700 | 0.715 |
| Xenobiotics | Xanthine metabolism  | 1-methylurate                       | 0.473 | 0.146 | 0.391 | 0.861 |

|             |                                 |                   |       |       |       |       |
|-------------|---------------------------------|-------------------|-------|-------|-------|-------|
| Xenobiotics | Xanthine metabolism             | 1,7-dimethylurate | 0.323 | 0.969 | 0.733 | 0.161 |
| Xenobiotics | Xanthine metabolism             | 1-methylxanthine  | 0.568 | 0.027 | 0.271 | 0.033 |
| Xenobiotics | Xanthine metabolism             | 3-methylxanthine  | 0.825 | 0.107 | 0.523 | 0.057 |
| Xenobiotics | Xanthine metabolism             | 7-methylxanthine  | 0.501 | 0.678 | 0.573 | 0.405 |
| Xenobiotics | Tobacco metabolite              | cotinine          | 0.252 | 0.252 | nd    | 0.351 |
| Xenobiotics | Sugar, sugar substitute, starch | erythritol        | 0.138 | 0.825 | 0.083 | 0.580 |

---

<sup>1</sup> T-tests were used to calculate P values for the likelihood of significant differences between and within genotypes pre and post intervention. Yellow denotes genotype 1> genotype 2, orange genotype 2>genotype 1, blue pre>post, red post>pre
